# Supplementary material for: Physiological and anatomical differentiation of two sympatric weed populations
Source: PeerJ journal article supplement (doi:10.7717/peerj.9226), 2020-06-15
Supplement: Neuffer_et_al._Suppl._Table_S1.docx [file Neuffer_et_al._Suppl._Table_S1.docx]

**Table S1**. Significance of differences between experimental groups compared in **Fig. 4**. As data were not normally distributed (Kolmogorov-Smirnov-test) we used parameter-free Mann-Whitney test. * = significant, ** highly significant differences between experimental groups.

|  |  | Stomata adaxial | Stomata abaxial |
| --- | --- | --- | --- |
|  |  | Asymptotic significance | |
| High light | wild type - *Spe* | 0.024* | 0.420 |
| Low light | wild type - *Spe* | 0.517 | 0.914 |
|  |  |  |  |
| High light versus low light | | 0.012* | 0.000** |
