# Supplementary material for: Physiological and anatomical differentiation of two sympatric weed populations
Source: PeerJ journal article supplement (doi:10.7717/peerj.9226), 2020-06-15
Supplement: Neuffer_et_al._Suppl._Table_S2.xlsx [file Neuffer_et_al._Suppl._Table_S2.xlsx]

## Sheet: Tabelle1
Suppl. Table S2 Raw data CO2-concentration dependence of the rate of CO2 assimilation
50614	1961121	rot	low-light	spe	Obs	HHMMSS	FTime	EBal?	Photo	Cond	Ci	Adark	RedAbs	BlueAbs	%Blue	LeafAbs	PhiCO2	PS2/1	ETR	Trmmol	VpdL	CTleaf	Area	BLC_1	StmRat	BLCond	Tair	Tleaf	TBlk	CO2R	CO2S	H2OR	H2OS	RH_R	RH_S	Flow	PARi	PARo	Press	CsMch	HsMch	StableF	BLCslope	BLCoffst	f_parin	f_parout	alphaK	Status	Time
50614	1961121	rot	low-light	spe	in	in	in	in	out	out	out	in	in	in	in	out	out	in	out	out	out	out	in	out	in	out	in	in	in	in	in	in	in	in	in	in	in	in	in	in	in	in	in	in	in	in	in	in	in
50614	1961121	rot	low-light	spe	1	10:56:48	493.5	0	6.95835	0.112549	286.483	-2.29	0.87	0.92	9.95181	0.874976	0.00874389	0.5	0	1.78357	1.57505	21.7042	2	4.64486	1	9.28972	17.6131	21.7042	14.9322	400.269	395.16	9.13107	10.3077	45.1803	51.0023	300.039	1208.82	0.199775	100.02	0.275787	-0.208048	0.25	-1.35514	7.35514	1	0	0.16	111115	15408
50614	1961121	rot	low-light	spe	2	11:00:22	707.5	0	2.69617	0.114056	154.887	-2.29	0.87	0.92	9.95181	0.874976	0.00471371	0.5	0	1.72926	1.50765	21.2776	2	4.64486	1	9.28972	16.961	21.2776	14.2286	199.45	197.426	9.16934	10.3101	47.2788	53.1607	300.055	1208.95	0.155885	100.018	0.97197	-0.221354	0.5	-1.35514	7.35514	1	0	0.16	111115	15622
50614	1961121	rot	low-light	spe	3	11:02:58	863.5	0	0.425398	0.119703	92.3685	-2.29	0.87	0.92	9.95181	0.874976	0.00256643	0.5	0	1.77094	1.47237	21.0731	2	4.64486	1	9.28972	16.7495	21.0731	14.0201	100.826	100.424	9.17713	10.3452	47.9625	54.0674	300.081	1209.23	0.243666	100.027	0.824417	-0.232465	0.5	-1.35514	7.35514	1	0	0.16	111115	15778
50614	1961121	rot	low-light	spe	4	11:05:05	990.5	0	-0.166054	0.123741	80.523	-2.29	0.87	0.92	9.95181	0.874976	0.00200719	0.5	0	1.80438	1.45183	20.9547	2	4.64486	1	9.28972	16.6399	20.9547	13.907	80.2341	80.2482	9.1794	10.3696	48.3057	54.5689	300.066	1209.37	0.191704	100.019	0.825546	-0.238563	0.5	-1.35514	7.35514	1	0	0.16	111135	15905
50614	1961121	rot	low-light	spe	5	11:07:11	1116.5	0	-1.76709	0.127832	23.4533	-2.29	0.87	0.92	9.95181	0.874976	0.00049408	0.5	0	1.83827	1.43261	20.844	2	4.64486	1	9.28972	16.5584	20.844	13.8273	0.187827	1.36397	9.17959	10.3921	48.5617	54.9761	300.063	1209.58	0.12713	100.027	0.124467	-0.252255	0.75	-1.35514	7.35514	1	0	0.16	111105	16031
50614	1961121	rot	low-light	spe	6	11:10:45	1330	0	8.81166	0.133456	281.09	-2.29	0.87	0.92	9.95181	0.874976	0.0104874	0.5	0	1.88421	1.40747	20.6994	2	4.64486	1	9.28972	16.4661	20.6994	13.7469	402.141	395.771	9.18196	10.4247	48.8587	55.4718	300.065	1209.83	0.278479	100.024	0.274705	-0.208742	0.5	-1.35514	7.35514	1	0	0.16	111115	16244.5
50614	1961121	rot	low-light	spe	7	11:14:16	1541.5	0	11.5935	0.135383	636.096	-2.29	0.87	0.92	9.95181	0.874976	0.0131177	0.5	0	1.88748	1.39022	20.5914	2	4.64486	1	9.28972	16.4173	20.5914	13.7037	799.659	790.937	9.19007	10.4349	49.0531	55.6978	300.077	1209.61	0.18111	100.022	-2.38081	-0.187584	0.25	-1.35514	7.35514	1	0	0.16	111115	16456
50614	1961121	rot	low-light	spe	8	11:17:50	1755.5	0	12.7624	0.136661	1014.65	-2.29	0.87	0.92	9.95181	0.874976	0.0142173	0.5	0	1.8858	1.37626	20.4955	2	4.64486	1	9.28972	16.3659	20.4955	13.6448	1200.6	1190.6	9.18728	10.4311	49.1986	55.8592	300.069	1210.02	0.179596	100.021	-7.03255	-0.160227	0.25	-1.35514	7.35514	1	0	0.16	111115	16670
					9	11:20:54	1939.5	0	12.9219	0.131855	1788.6	-2.29	0.87	0.92	9.95181	0.874976	0.0143679	0.5	0	1.81714	1.37389	20.4443	2	4.64486	1	9.28972	16.2894	20.4443	13.5659	2000.49	1989.47	9.17975	10.3783	49.3989	55.8488	300.067	1210.02	0.17455	100.022	-18.918	-0.122036	0.25	-1.35514	7.35514	1	0	0.16	111115	16854
60614	1956522	grün	low-light	spe	Obs	HHMMSS	FTime	EBal?	Photo	Cond	Ci	Adark	RedAbs	BlueAbs	%Blue	LeafAbs	PhiCO2	PS2/1	ETR	Trmmol	VpdL	CTleaf	Area	BLC_1	StmRat	BLCond	Tair	Tleaf	TBlk	CO2R	CO2S	H2OR	H2OS	RH_R	RH_S	Flow	PARi	PARo	Press	CsMch	HsMch	StableF	BLCslope	BLCoffst	f_parin	f_parout	alphaK	Status	Time
60614	1956522	grün	low-light	spe	in	in	in	in	out	out	out	in	in	in	in	out	out	in	out	out	out	out	in	out	in	out	in	in	in	in	in	in	in	in	in	in	in	in	in	in	in	in	in	in	in	in	in	in	in
60614	1956522	grün	low-light	spe	1	11:04:29	526.5	0	5.73371	0.17669	333.538	-2.29	0.87	0.92	9.95181	0.874976	0.00758968	0.5	0	2.52443	1.43658	21.9484	2	4.64486	1	9.28972	18.2182	21.9484	15.6242	399.251	394.765	10.3514	12.0139	49.5908	57.5552	300.049	1208.25	0.218949	100.599	-0.0128784	-0.243846	0.5	-1.35514	7.35514	1	0	0.16	111115	17349
60614	1956522	grün	low-light	spe	2	11:08:03	740	0	2.55602	0.162346	167.46	-2.29	0.87	0.92	9.95181	0.874976	0.00458242	0.5	0	2.28033	1.4105	21.6944	2	4.64486	1	9.28972	17.3606	21.6944	14.6323	199.19	197.186	10.3671	11.869	52.4198	60.0138	300.059	1208.63	0.172532	100.594	0.666473	-0.314132	0.25	-1.35514	7.35514	1	0	0.16	111115	17562.5
60614	1956522	grün	low-light	spe	3	11:10:30	887.5	0	0.515417	0.181356	92.2248	-2.29	0.87	0.92	9.95181	0.874976	0.00265262	0.5	0	2.44887	1.3589	21.4367	2	4.64486	1	9.28972	17.1173	21.4367	14.38	99.4527	98.9477	10.3644	11.9771	53.2183	61.4991	300.06	1208.72	0.159416	100.593	0.508751	-0.260808	0.5	-1.35514	7.35514	1	0	0.16	111115	17710
60614	1956522	grün	low-light	spe	4	11:12:22	999.5	0	0.170102	0.188623	85.1534	-2.29	0.87	0.92	9.95181	0.874976	0.00232567	0.5	0	2.51218	1.34141	21.3482	2	4.64486	1	9.28972	17.0029	21.3482	14.2697	88.7654	88.5038	10.3589	12.0132	53.577	62.1329	300.077	1208.95	0.0958511	100.593	0.599075	-0.268249	0.5	-1.35514	7.35514	1	0	0.16	111135	17822
60614	1956522	grün	low-light	spe	5	11:14:39	1136.5	0	-1.97368	0.201207	22.8138	-2.29	0.87	0.92	9.95181	0.874976	0.000299102	0.5	0	2.61414	1.31047	21.1866	2	4.64486	1	9.28972	16.925	21.1866	14.1938	5.84209	7.14521	10.3487	12.0702	53.7915	62.7394	300.047	1208.7	0.201793	100.597	0.147778	-0.283145	0.75	-1.35514	7.35514	1	0	0.16	111105	17959
60614	1956522	grün	low-light	spe	6	11:18:19	1356.5	0	7.73384	0.218547	330.321	-2.29	0.87	0.92	9.95181	0.874976	0.0094747	0.5	0	2.75162	1.27237	20.9888	2	4.64486	1	9.28972	16.8458	20.9888	14.1193	401.421	395.541	10.3346	12.1463	53.9867	63.4509	300.067	1209.13	0.15639	100.593	0.0436211	-0.243135	0.25	-1.35514	7.35514	1	0	0.16	111115	18179
60614	1956522	grün	low-light	spe	7	11:21:54	1571	0	10.1002	0.237668	707.904	-2.29	0.87	0.92	9.95181	0.874976	0.0117116	0.5	0	2.92061	1.24443	20.868	2	4.64486	1	9.28972	16.8265	20.868	14.0985	800.737	792.462	10.3176	12.2405	53.9649	64.0219	300.066	1209.11	0.0998874	100.595	-3.32113	-0.175388	0.25	-1.35514	7.35514	1	0	0.16	111115	18393.5
60614	1956522	grün	low-light	spe	8	11:24:35	1732	0	10.9787	0.240934	1093.62	-2.29	0.87	0.92	9.95181	0.874976	0.0125409	0.5	0	2.94495	1.23823	20.831	2	4.64486	1	9.28972	16.8284	20.831	14.0943	1200.64	1190.98	10.3074	12.2463	53.9041	64.044	300.051	1209.21	0.133183	100.593	-8.02523	-0.149817	0.5	-1.35514	7.35514	1	0	0.16	111115	18554.5
60614	1956522	grün	low-light	spe	9	11:28:00	1937.5	0	15.3884	0.223282	1838.43	-2.29	0.87	0.92	9.95181	0.874976	0.0167052	0.5	0	2.76635	1.2528	20.8427	2	4.64486	1	9.28972	16.8191	20.8427	14.0879	2003.62	1989.69	10.2981	12.1196	53.8853	63.4169	300.049	1209.47	0.26334	100.59	-19.7126	-0.154124	0.25	-1.35514	7.35514	1	0	0.16	111115	18760
60614	1956523	grün	low-light	spe	Obs	HHMMSS	FTime	EBal?	Photo	Cond	Ci	Adark	RedAbs	BlueAbs	%Blue	LeafAbs	PhiCO2	PS2/1	ETR	Trmmol	VpdL	CTleaf	Area	BLC_1	StmRat	BLCond	Tair	Tleaf	TBlk	CO2R	CO2S	H2OR	H2OS	RH_R	RH_S	Flow	PARi	PARo	Press	CsMch	HsMch	StableF	BLCslope	BLCoffst	f_parin	f_parout	alphaK	Status	Time
60614	1956523	grün	low-light	spe	in	in	in	in	out	out	out	in	in	in	in	out	out	in	out	out	out	out	in	out	in	out	in	in	in	in	in	in	in	in	in	in	in	in	in	in	in	in	in	in	in	in	in	in	in
60614	1956523	grün	low-light	spe	1	06:29:48	641.5	0	3.76887	0.0594041	287.332	-2.29	0.87	0.92	9.95181	0.874976	0.00571762	0.5	0	0.92903	1.55693	21.3044	2	4.64486	1	9.28972	16.9877	21.3044	14.261	400.779	398.021	9.1805	9.79357	47.5718	50.7486	300.11	1211.1	0.129658	100.685	0.562408	-0.150756	0.5	-1.35514	7.35514	1	0	0.16	111115	868
60614	1956523	grün	low-light	spe	2	06:32:42	815.5	0	1.44064	0.0734331	162.574	-2.29	0.87	0.92	9.95181	0.874976	0.00351921	0.5	0	1.08627	1.47522	20.8746	2	4.64486	1	9.28972	16.3908	20.8746	13.6158	199.581	198.478	9.23069	9.94745	49.6795	53.5371	300.092	1211.55	0.143785	100.684	1.04868	-0.178904	0.5	-1.35514	7.35514	1	0	0.16	111115	1042
60614	1956523	grün	low-light	spe	3	06:34:45	938.5	0	0.0474657	0.086062	96.6925	-2.29	0.87	0.92	9.95181	0.874976	0.00220483	0.5	0	1.22879	1.42599	20.6284	2	4.64486	1	9.28972	16.1863	20.6284	13.418	99.9581	99.8447	9.25561	10.0663	50.4667	54.8872	300.087	1211.64	0.174557	100.683	0.85054	-0.202091	0.75	-1.35514	7.35514	1	0	0.16	111115	1165
60614	1956523	grün	low-light	spe	4	06:36:43	1056.5	0	-0.0215832	0.0969494	82.1211	-2.29	0.87	0.92	9.95181	0.874976	0.00213901	0.5	0	1.35595	1.39857	20.5158	2	4.64486	1	9.28972	16.0762	20.5158	13.3089	83.6941	83.6329	9.27622	10.1707	50.9378	55.8498	300.085	1212.03	0.113513	100.687	0.842171	-0.219814	1	-1.35514	7.35514	1	0	0.16	111135	1283
60614	1956523	grün	low-light	spe	5	06:38:45	1178.5	0	-1.74926	0.103523	28.01	-2.29	0.87	0.92	9.95181	0.874976	0.000509993	0.5	0	1.42167	1.37433	20.394	2	4.64486	1	9.28972	15.9879	20.394	13.2281	-0.12642	1.03853	9.29286	10.2307	51.3198	56.4992	300.062	1211.79	0.234089	100.691	0.430841	-0.275985	0.5	-1.35514	7.35514	1	0	0.16	111105	1405
60614	1956523	grün	low-light	spe	6	06:42:19	1392.5	0	5.84103	0.12719	315.537	-2.29	0.87	0.92	9.95181	0.874976	0.00766514	0.5	0	1.68584	1.32977	20.2361	2	4.64486	1	9.28972	15.9038	20.2361	13.1519	401.865	397.526	9.33006	10.442	51.8011	57.9744	300.072	1212.35	0.226521	100.687	0.621515	-0.215163	0.5	-1.35514	7.35514	1	0	0.16	111115	1619
60614	1956523	grün	low-light	spe	7	06:44:39	1532.5	0	6.17856	0.139249	706.759	-2.29	0.87	0.92	9.95181	0.874976	0.00798592	0.5	0	1.81852	1.31184	20.1917	2	4.64486	1	9.28972	15.8725	20.1917	13.1199	799.631	794.55	9.35614	10.5554	52.0494	58.7208	300.085	1211.96	0.0918189	100.686	-2.60651	-0.19495	0.5	-1.35514	7.35514	1	0	0.16	111115	1759
60614	1956523	grün	low-light	spe	8	06:48:13	1746	0	9.0841	0.151254	1070.87	-2.29	0.87	0.92	9.95181	0.874976	0.0107222	0.5	0	1.94149	1.29101	20.1348	2	4.64486	1	9.28972	15.8479	20.1348	13.096	1199.46	1191.86	9.39894	10.6792	52.37	59.5035	300.057	1212.38	0.200792	100.687	-7.22797	-0.180076	0.25	-1.35514	7.35514	1	0	0.16	111115	1972.5
60614	1956523	grün	low-light	spe	9	06:51:15	1928	0	11.1908	0.153812	1832.81	-2.29	0.87	0.92	9.95181	0.874976	0.012707	0.5	0	1.96	1.28198	20.1061	2	4.64486	1	9.28972	15.8278	20.1061	13.0833	2000.45	1990.39	9.43493	10.7272	52.638	59.8479	300.077	1212.49	0.193729	100.687	-19.7354	-0.144762	0.5	-1.35514	7.35514	1	0	0.16	111115	2154.5
30614	19511938	blau	high-light	WT	Obs	HHMMSS	FTime	EBal?	Photo	Cond	Ci	Adark	RedAbs	BlueAbs	%Blue	LeafAbs	PhiCO2	PS2/1	ETR	Trmmol	VpdL	CTleaf	Area	BLC_1	StmRat	BLCond	Tair	Tleaf	TBlk	CO2R	CO2S	H2OR	H2OS	RH_R	RH_S	Flow	PARi	PARo	Press	CsMch	HsMch	StableF	BLCslope	BLCoffst	f_parin	f_parout	alphaK	Status	Time
30614	19511938	blau	high-light	WT	in	in	in	in	out	out	out	in	in	in	in	out	out	in	out	out	out	out	in	out	in	out	in	in	in	in	in	in	in	in	in	in	in	in	in	in	in	in	in	in	in	in	in	in	in
30614	19511938	blau	high-light	WT	1	10:17:24	994.5	0	15.3055	0.251607	283.036	-2.29	0.87	0.92	9.95181	0.874976	0.0166474	0.5	0	3.1426	1.26385	20.9227	2	4.64486	1	9.28972	18.0642	20.9227	15.4444	400.516	389.498	10.088	12.1573	48.6888	58.6757	300.05	1207.98	0.180104	100.372	-0.0662498	-0.226001	0.75	-1.35514	7.35514	1	0	0.16	111115	9950
30614	19511938	blau	high-light	WT	2	10:19:32	1122.5	0	7.0935	0.251005	145.489	-2.29	0.87	0.92	9.95181	0.874976	0.00887821	0.5	0	3.01283	1.21492	20.5305	2	4.64486	1	9.28972	17.2401	20.5305	14.5083	200.217	195.098	10.0704	12.0543	51.1957	61.2813	300.073	1207.94	0.060034	100.371	0.695057	-0.237436	0.75	-1.35514	7.35514	1	0	0.16	111115	10078
30614	19511938	blau	high-light	WT	3	10:21:47	1257	0	2.08491	0.250043	83.2693	-2.29	0.87	0.92	9.95181	0.874976	0.0041382	0.5	0	2.89959	1.17398	20.1907	2	4.64486	1	9.28972	16.8074	20.1907	14.0643	100.225	98.6444	10.051	11.9605	52.5172	62.4947	300.062	1208.26	0.1236	100.371	0.66576	-0.242584	1	-1.35514	7.35514	1	0	0.16	111115	10212.5
30614	19511938	blau	high-light	WT	4	10:23:31	1361.5	0	1.54544	0.240292	80.5373	-2.29	0.87	0.92	9.95181	0.874976	0.00362847	0.5	0	2.75385	1.15924	20.0103	2	4.64486	1	9.28972	16.6096	20.0103	13.867	93.8792	92.679	10.031	11.8449	53.0743	62.6719	300.04	1208.08	0.0797093	100.37	0.738461	-0.283345	0.5	-1.35514	7.35514	1	0	0.16	111135	10317
30614	19511938	blau	high-light	WT	5	10:25:38	1488.5	0	-3.11534	0.239623	22.89	-2.29	0.87	0.92	9.95181	0.874976	-0.000780799	0.5	0	2.71883	1.14775	19.8937	2	4.64486	1	9.28972	16.4782	19.8937	13.7344	-0.214616	1.85855	10.0002	11.7911	53.3556	62.9107	300.052	1208.09	0.118051	100.37	0.0654274	-0.288503	0.75	-1.35514	7.35514	1	0	0.16	111105	10444
30614	19511938	blau	high-light	WT	6	10:29:13	1703.5	0	14.8692	0.24582	286.15	-2.29	0.87	0.92	9.95181	0.874976	0.016229	0.5	0	2.79763	1.15191	19.9257	2	4.64486	1	9.28972	17.022	19.9257	14.6005	402.073	391.432	9.95341	11.7961	51.3018	60.7994	300.063	1208.39	0.168498	100.366	0.00784075	-0.247103	0.25	-1.35514	7.35514	1	0	0.16	111115	10659
30614	19511938	blau	high-light	WT	7	10:32:41	1911	0	21.2738	0.253864	633.809	-2.29	0.87	0.92	9.95181	0.874976	0.0222852	0.5	0	2.92279	1.16616	20.0505	2	4.64486	1	9.28972	17.0986	20.0505	14.5969	800.103	784.395	9.9097	11.8349	50.8287	60.7032	300.046	1208.46	0.156897	100.365	-3.42111	-0.173316	0.5	-1.35514	7.35514	1	0	0.16	111115	10866.5
30614	19511938	blau	high-light	WT	8	10:36:16	2126	0	21.8243	0.258101	1022.88	-2.29	0.87	0.92	9.95181	0.874976	0.0228054	0.5	0	2.97258	1.16702	20.0645	2	4.64486	1	9.28972	17.1012	20.0645	14.5969	1199.07	1182.19	9.88921	11.847	50.7137	60.7535	300.071	1208.48	0.172535	100.362	-8.04978	-0.147371	0.25	-1.35514	7.35514	1	0	0.16	111115	11081.5
30614	19511938	blau	high-light	WT	9	10:39:27	2317	0	24.0203	0.25509	1790.37	-2.29	0.87	0.92	9.95181	0.874976	0.0248771	0.5	0	2.94924	1.17117	20.0585	2	4.64486	1	9.28972	17.1002	20.0585	14.5961	2000.18	1980.28	9.85436	11.797	50.5376	60.5003	300.051	1208.73	0.0600343	100.361	-20.5244	-0.107552	0.75	-1.35514	7.35514	1	0	0.16	111115	11272.5
30614	19602542	gelb	highlight	WT	Obs	HHMMSS	FTime	EBal?	Photo	Cond	Ci	Adark	RedAbs	BlueAbs	%Blue	LeafAbs	PhiCO2	PS2/1	ETR	Trmmol	VpdL	CTleaf	Area	BLC_1	StmRat	BLCond	Tair	Tleaf	TBlk	CO2R	CO2S	H2OR	H2OS	RH_R	RH_S	Flow	PARi	PARo	Press	CsMch	HsMch	StableF	BLCslope	BLCoffst	f_parin	f_parout	alphaK	Status	Time
30614	19602542	gelb	highlight	WT	in	in	in	in	out	out	out	in	in	in	in	out	out	in	out	out	out	out	in	out	in	out	in	in	in	in	in	in	in	in	in	in	in	in	in	in	in	in	in	in	in	in	in	in	in
30614	19602542	gelb	highlight	WT	1	08:49:40	1771.5	0	17.0726	0.211175	251.94	-2.29	0.87	0.92	9.95181	0.874976	0.0182846	0.5	0	2.26559	1.08142	20.3733	2	4.64486	1	9.28972	16.1517	20.3733	13.4084	401.39	389.423	11.6547	13.1448	63.5215	71.6433	300.079	1210.27	0.176573	100.42	0.530145	-0.310345	0.25	-1.35514	7.35514	1	0	0.16	111115	4686
30614	19602542	gelb	highlight	WT	2	08:53:16	1987.5	0	8.91478	0.283307	138.613	-2.29	0.87	0.92	9.95181	0.874976	0.0105751	0.5	0	2.85539	1.02368	20.1454	2	4.64486	1	9.28972	16.0387	20.1454	13.3101	199.327	193.018	11.5079	13.3856	63.1745	73.4821	300.074	1210.94	0.149329	100.418	0.835855	-0.314297	0.5	-1.35514	7.35514	1	0	0.16	111115	4902
30614	19602542	gelb	highlight	WT	3	08:56:52	2203	0	3.34457	0.342625	80.1576	-2.29	0.87	0.92	9.95181	0.874976	0.00531738	0.5	0	3.26025	0.972554	19.8923	2	4.64486	1	9.28972	15.8995	19.8923	13.1846	100.107	97.6658	11.3846	13.5282	63.0554	74.928	300.071	1211.06	0.162448	100.417	0.683115	-0.32845	0.75	-1.35514	7.35514	1	0	0.16	111115	5117.5
30614	19602542	gelb	highlight	WT	4	08:59:13	2344.5	0	3.24075	0.380092	75.9035	-2.29	0.87	0.92	9.95181	0.874976	0.00521926	0.5	0	3.52189	0.950775	19.8053	2	4.64486	1	9.28972	15.8673	19.8053	13.1611	93.6806	91.3063	11.3045	13.6198	62.7428	75.5934	300.081	1211.1	0.102916	100.42	0.611787	-0.327098	0.5	-1.35514	7.35514	1	0	0.16	111125	5259
30614	19602542	gelb	highlight	WT	5	09:02:01	2512.5	0	-3.49215	0.448397	14.9154	-2.29	0.87	0.92	9.95181	0.874976	-0.00113401	0.5	0	4.0609	0.935655	19.8874	2	4.64486	1	9.28972	16.5272	19.8874	14.2132	-0.254303	2.06763	11.2193	13.8883	59.7026	73.9055	300.074	1211.56	0.0721426	100.419	0.209568	-0.350761	0.25	-1.35514	7.35514	1	0	0.16	111105	5427
30614	19602542	gelb	highlight	WT	6	09:04:52	2670	0	19.6634	0.465913	309.376	-2.29	0.87	0.92	9.95181	0.874976	0.0207109	0.5	0	4.21505	0.936293	19.91	2	4.64486	1	9.28972	16.6175	19.91	14.2079	399.232	385.044	11.1444	13.9147	58.9635	73.621	300.063	1211.45	0.201799	100.416	-0.127956	-0.304915	0.25	-1.35514	7.35514	1	0	0.16	111115	5584.5
30614	19602542	gelb	highlight	WT	7	09:08:30	2901	0	26.6922	0.495076	677.942	-2.29	0.87	0.92	9.95181	0.874976	0.0273431	0.5	0	4.46002	0.935067	19.9421	2	4.64486	1	9.28972	16.648	19.9421	14.2086	799.23	779.123	11.0425	13.9736	58.31	73.7876	300.073	1211.4	0.173042	100.414	-3.56594	-0.274999	0.5	-1.35514	7.35514	1	0	0.16	111115	5815.5
30614	19602542	gelb	highlight	WT	8	09:12:07	3118	0	28.3853	0.514741	1068.46	-2.29	0.87	0.92	9.95181	0.874976	0.0289394	0.5	0	4.60939	0.931356	19.9221	2	4.64486	1	9.28972	16.6441	19.9221	14.2084	1200.27	1177.74	10.9522	13.9815	57.8483	73.8489	300.064	1211.44	0.141258	100.416	-7.85635	-0.254786	0.25	-1.35514	7.35514	1	0	0.16	111115	6032.5
30614	19602542	gelb	highlight	WT	9	09:15:45	3336.5	0	29.161	0.532152	1854.08	-2.29	0.87	0.92	9.95181	0.874976	0.0296676	0.5	0	4.73613	0.927329	19.8919	2	4.64486	1	9.28972	16.65	19.8919	14.2081	2000.32	1974.65	10.8653	13.9779	57.3678	73.8026	300.058	1211.59	0.133186	100.417	-20.5564	-0.212595	0.25	-1.35514	7.35514	1	0	0.16	111115	6251
40614	19511937	blau	high-light	WT	Obs	HHMMSS	FTime	EBal?	Photo	Cond	Ci	Adark	RedAbs	BlueAbs	%Blue	LeafAbs	PhiCO2	PS2/1	ETR	Trmmol	VpdL	CTleaf	Area	BLC_1	StmRat	BLCond	Tair	Tleaf	TBlk	CO2R	CO2S	H2OR	H2OS	RH_R	RH_S	Flow	PARi	PARo	Press	CsMch	HsMch	StableF	BLCslope	BLCoffst	f_parin	f_parout	alphaK	Status	Time
40614	19511937	blau	high-light	WT	in	in	in	in	out	out	out	in	in	in	in	out	out	in	out	out	out	out	in	out	in	out	in	in	in	in	in	in	in	in	in	in	in	in	in	in	in	in	in	in	in	in	in	in	in
40614	19511937	blau	high-light	WT	1	06:44:37	252.5	0	2.66464	0.0212812	189.362	-2.29	0.87	0.92	9.95181	0.874976	0.00467476	0.5	0	0.351976	1.62027	22.8299	2	4.64486	1	9.28972	17.5386	22.8299	14.9431	399.747	397.878	11.5064	11.7382	57.0312	58.1803	300.06	1211.31	0.177587	99.7215	0.396605	-0.19272	0.5	-1.35514	7.35514	1	0	0.16	111115	1550
40614	19511937	blau	high-light	WT	2	06:46:58	393.5	0	1.03498	0.0240568	126.042	-2.29	0.87	0.92	9.95181	0.874976	0.00313626	0.5	0	0.377892	1.53965	22.4561	2	4.64486	1	9.28972	16.8129	22.4561	14.0841	199.866	199.126	11.6702	11.9191	60.5609	61.8523	300.079	1211.66	0.105441	99.7199	1.16168	-0.212386	0.75	-1.35514	7.35514	1	0	0.16	111115	1691
40614	19511937	blau	high-light	WT	3	06:49:07	522.5	0	-0.0316791	0.0302816	99.3197	-2.29	0.87	0.92	9.95181	0.874976	0.00212995	0.5	0	0.453976	1.47064	22.1438	2	4.64486	1	9.28972	16.4692	22.1438	13.7314	100.048	100.039	11.7973	12.0962	62.5719	64.1574	300.071	1211.77	0.2129	99.7194	0.962301	-0.234524	0.75	-1.35514	7.35514	1	0	0.16	111115	1820
40614	19511937	blau	high-light	WT	4	06:50:40	615.5	0	0.597306	0.0359194	69.2751	-2.29	0.87	0.92	9.95181	0.874976	0.00272273	0.5	0	0.524304	1.43286	21.9917	2	4.64486	1	9.28972	16.3107	21.9917	13.5783	98.361	97.9286	11.882	12.2272	63.6616	65.5111	300.058	1211.97	0.153369	99.7209	0.820959	-0.24197	0.75	-1.35514	7.35514	1	0	0.16	111135	1913
40614	19511937	blau	high-light	WT	5	06:52:47	742.5	0	-1.94152	0.0431833	72.6115	-2.29	0.87	0.92	9.95181	0.874976	0.000328673	0.5	0	0.610152	1.38818	21.8081	2	4.64486	1	9.28972	16.1673	21.8081	13.437	-0.0663642	1.22722	11.9771	12.3787	64.7608	66.9326	300.062	1211.76	0.10645	99.722	0.394556	-0.290078	0.5	-1.35514	7.35514	1	0	0.16	111105	2040
40614	19511937	blau	high-light	WT	6	06:55:54	929	0	9.61051	0.0634854	145.143	-2.29	0.87	0.92	9.95181	0.874976	0.0112215	0.5	0	0.846797	1.3134	21.5063	2	4.64486	1	9.28972	16.0418	21.5063	13.3136	401.192	394.564	12.0911	12.6484	65.8998	68.9371	300.069	1212.04	0.155889	99.717	0.514673	-0.245592	0.25	-1.35514	7.35514	1	0	0.16	111115	2226.5
40614	19511937	blau	high-light	WT	7	06:58:33	1088.5	0	18.632	0.0793874	396.927	-2.29	0.87	0.92	9.95181	0.874976	0.0197264	0.5	0	1.01134	1.2566	21.2656	2	4.64486	1	9.28972	15.976	21.2656	13.25	800.296	787.348	12.1752	12.8405	66.6346	70.2763	300.079	1212.16	0.151854	99.7126	-1.67258	-0.243957	0.25	-1.35514	7.35514	1	0	0.16	111115	2386
40614	19511937	blau	high-light	WT	8	07:02:06	1301.5	0	22.1635	0.103836	819.921	-2.29	0.87	0.92	9.95181	0.874976	0.0230613	0.5	0	1.27094	1.21045	21.1387	2	4.64486	1	9.28972	15.9429	21.1387	13.2181	1200.3	1184.52	12.2701	13.1061	67.2959	71.8811	300.063	1211.89	0.134701	99.7124	-6.24619	-0.253296	0.25	-1.35514	7.35514	1	0	0.16	111115	2599
40614	19511937	blau	high-light	WT	9	07:05:40	1515.5	0	20.9421	0.126765	1681.32	-2.29	0.87	0.92	9.95181	0.874976	0.0219073	0.5	0	1.49253	1.16715	21.0066	2	4.64486	1	9.28972	15.9431	21.0066	13.2082	1999.6	1983.67	12.3555	13.337	67.7606	73.1435	300.07	1212	0.173041	99.7077	-18.5364	-0.240558	0.25	-1.35514	7.35514	1	0	0.16	111115	2813
40614	19602543	gelb	high-light	WT	Obs	HHMMSS	FTime	EBal?	Photo	Cond	Ci	Adark	RedAbs	BlueAbs	%Blue	LeafAbs	PhiCO2	PS2/1	ETR	Trmmol	VpdL	CTleaf	Area	BLC_1	StmRat	BLCond	Tair	Tleaf	TBlk	CO2R	CO2S	H2OR	H2OS	RH_R	RH_S	Flow	PARi	PARo	Press	CsMch	HsMch	StableF	BLCslope	BLCoffst	f_parin	f_parout	alphaK	Status	Time
40614	19602543	gelb	high-light	WT	in	in	in	in	out	out	out	in	in	in	in	out	out	in	out	out	out	out	in	out	in	out	in	in	in	in	in	in	in	in	in	in	in	in	in	in	in	in	in	in	in	in	in	in	in
40614	19602543	gelb	high-light	WT	1	08:34:42	614	0	10.9462	0.139468	259.04	-2.29	0.87	0.92	9.95181	0.874976	0.0124963	0.5	0	1.68289	1.19547	21.8762	2	4.64486	1	9.28972	17.5564	21.8762	14.8529	400.338	392.602	13.3266	14.432	65.9277	71.3965	300.073	1210.56	0.153868	99.6441	0.591974	-0.40265	0.25	-1.35514	7.35514	1	0	0.16	111115	8154.5
40614	19602543	gelb	high-light	WT	2	08:36:55	747.5	0	4.10846	0.125785	140.973	-2.29	0.87	0.92	9.95181	0.874976	0.00603984	0.5	0	1.49235	1.17404	21.6676	2	4.64486	1	9.28972	17.1771	21.6676	14.4307	200.019	197.084	13.3315	14.312	67.5538	72.5223	300.045	1210.75	0.227525	99.6471	1.09551	-0.408437	0.25	-1.35514	7.35514	1	0	0.16	111115	8288
40614	19602543	gelb	high-light	WT	3	08:39:13	885.5	0	0.781544	0.124393	87.8187	-2.29	0.87	0.92	9.95181	0.874976	0.00289934	0.5	0	1.43863	1.14444	21.462	2	4.64486	1	9.28972	16.9654	21.462	14.2199	100.358	99.7417	13.3382	14.2835	68.4976	73.3518	300.048	1210.77	0.133185	99.643	0.782419	-0.416127	0.75	-1.35514	7.35514	1	0	0.16	111115	8426
40614	19602543	gelb	high-light	WT	4	08:40:58	990.5	0	0.821502	0.128414	84.7477	-2.29	0.87	0.92	9.95181	0.874976	0.00293723	0.5	0	1.46116	1.12653	21.3585	2	4.64486	1	9.28972	16.8815	21.3585	14.1296	97.4183	96.7765	13.3402	14.3002	68.8735	73.8297	300.061	1210.7	0.116537	99.6434	0.899187	-0.420649	1	-1.35514	7.35514	1	0	0.16	111135	8531
40614	19602543	gelb	high-light	WT	5	08:43:06	1118	0	-2.41741	0.135282	30.1785	-2.29	0.87	0.92	9.95181	0.874976	-0.000120282	0.5	0	1.51725	1.11126	21.2781	2	4.64486	1	9.28972	16.8171	21.2781	14.0683	-0.090947	1.51879	13.3306	14.3274	69.1064	74.2738	300.062	1210.61	0.121076	99.6439	0.052748	-0.442005	0.75	-1.35514	7.35514	1	0	0.16	111105	8658.5
40614	19602543	gelb	high-light	WT	6	08:46:40	1332	0	11.5527	0.155631	265.951	-2.29	0.87	0.92	9.95181	0.874976	0.0130654	0.5	0	1.67007	1.06562	21.0304	2	4.64486	1	9.28972	16.7429	21.0304	14.004	400.292	392.155	13.3052	14.4023	69.294	75.0079	300.058	1210.88	0.117041	99.6352	0.492934	-0.398352	0.25	-1.35514	7.35514	1	0	0.16	111115	8872.5
40614	19602543	gelb	high-light	WT	7	08:49:32	1504	0	17.6319	0.1711	607.416	-2.29	0.87	0.92	9.95181	0.874976	0.0188029	0.5	0	1.8024	1.04778	20.9535	2	4.64486	1	9.28972	16.7181	20.9535	13.9783	799.529	786.831	13.2797	14.4637	69.267	75.4429	300.048	1210.9	0.158409	99.6304	-2.2484	-0.383598	0.25	-1.35514	7.35514	1	0	0.16	111115	9044.5
40614	19602543	gelb	high-light	WT	8	08:53:07	1719.5	0	20.976	0.202725	997.114	-2.29	0.87	0.92	9.95181	0.874976	0.0219592	0.5	0	2.06765	1.01787	20.8414	2	4.64486	1	9.28972	16.6847	20.8414	13.9466	1199.5	1183.89	13.2343	14.5924	69.1765	76.275	300.06	1210.9	0.248207	99.6299	-7.41661	-0.316552	0.25	-1.35514	7.35514	1	0	0.16	111115	9260
40614	19602543	gelb	high-light	WT	9	08:56:42	1934	0	21.4282	0.21262	1787.75	-2.29	0.87	0.92	9.95181	0.874976	0.0223832	0.5	0	2.16643	1.01782	20.8578	2	4.64486	1	9.28972	16.6725	20.8578	13.9391	2000.65	1983.5	13.1962	14.6191	69.0255	76.468	300.067	1211.05	0.176065	99.6219	-19.0643	-0.2879	0.25	-1.35514	7.35514	1	0	0.16	111115	9474.5
50614	19511937	blau	high-light	WT	Obs	HHMMSS	FTime	EBal?	Photo	Cond	Ci	Adark	RedAbs	BlueAbs	%Blue	LeafAbs	PhiCO2	PS2/1	ETR	Trmmol	VpdL	CTleaf	Area	BLC_1	StmRat	BLCond	Tair	Tleaf	TBlk	CO2R	CO2S	H2OR	H2OS	RH_R	RH_S	Flow	PARi	PARo	Press	CsMch	HsMch	StableF	BLCslope	BLCoffst	f_parin	f_parout	alphaK	Status	Time
50614	19511937	blau	high-light	WT	in	in	in	in	out	out	out	in	in	in	in	out	out	in	out	out	out	out	in	out	in	out	in	in	in	in	in	in	in	in	in	in	in	in	in	in	in	in	in	in	in	in	in	in	in
50614	19511937	blau	high-light	WT	1	08:07:04	583	0	18.56	0.395251	301.939	-2.29	0.87	0.92	9.95181	0.874976	0.0196793	0.5	0	4.83944	1.2529	20.365	2	4.64486	1	9.28972	17.479	20.365	14.7967	400.418	386.8	8.29259	11.4813	41.3416	57.2383	300.054	1210.88	0.180608	99.9259	0.764088	-0.190038	0.25	-1.35514	7.35514	1	0	0.16	111115	5223.5
50614	19511937	blau	high-light	WT	2	08:10:41	800.5	0	8.35063	0.381551	154.211	-2.29	0.87	0.92	9.95181	0.874976	0.010043	0.5	0	4.44657	1.19156	19.7565	2	4.64486	1	9.28972	16.4961	19.7565	13.7495	199.959	193.819	8.27647	11.2071	43.9141	59.4636	300.056	1210.9	0.233579	99.9274	1.49678	-0.199005	0.5	-1.35514	7.35514	1	0	0.16	111115	5441
50614	19511937	blau	high-light	WT	3	08:12:49	928	0	2.77413	0.367922	83.8574	-2.29	0.87	0.92	9.95181	0.874976	0.00478033	0.5	0	4.25332	1.18059	19.5848	2	4.64486	1	9.28972	16.2706	19.5848	13.5231	100.197	98.0701	8.26779	11.0713	44.5037	59.5943	300.07	1210.74	0.118555	99.9301	1.22208	-0.200561	0.5	-1.35514	7.35514	1	0	0.16	111115	5568.5
50614	19511937	blau	high-light	WT	4	08:14:51	1050.5	0	1.75571	0.334727	69.0329	-2.29	0.87	0.92	9.95181	0.874976	0.00381765	0.5	0	3.96922	1.20694	19.6303	2	4.64486	1	9.28972	16.732	19.6303	14.404	80.5127	79.1331	8.2553	10.8722	43.152	56.8312	300.051	1211.16	0.162447	99.9322	0.971394	-0.183086	0.5	-1.35514	7.35514	1	0	0.16	111135	5691
50614	19511937	blau	high-light	WT	5	08:17:41	1220	0	-3.1884	0.279849	20.5203	-2.29	0.87	0.92	9.95181	0.874976	-0.000847952	0.5	0	3.56219	1.28813	19.998	2	4.64486	1	9.28972	17.1663	19.998	14.7878	-0.0636486	2.05663	8.23913	10.5883	41.901	53.8479	300.062	1210.88	0.0968612	99.9398	0.734154	-0.194085	0.5	-1.35514	7.35514	1	0	0.16	111105	5860.5
50614	19511937	blau	high-light	WT	6	08:21:17	1436	0	17.0234	0.264718	277.095	-2.29	0.87	0.92	9.95181	0.874976	0.0182255	0.5	0	3.43413	1.31069	20.0904	2	4.64486	1	9.28972	17.2001	20.0904	14.7908	401.824	389.585	8.23243	10.4974	41.7772	53.271	300.06	1211.11	0.127132	99.9389	0.655694	-0.144933	0.25	-1.35514	7.35514	1	0	0.16	111115	6076.5
50614	19511937	blau	high-light	WT	7	08:24:53	1652	0	24.345	0.267333	616.993	-2.29	0.87	0.92	9.95181	0.874976	0.0251378	0.5	0	3.46578	1.31024	20.1009	2	4.64486	1	9.28972	17.2081	20.1009	14.7907	799.178	781.148	8.231	10.5167	41.7509	53.3447	300.074	1210.96	0.118049	99.9445	-2.37885	-0.116476	0.5	-1.35514	7.35514	1	0	0.16	111115	6292.5
50614	19511937	blau	high-light	WT	8	08:28:29	1868	0	25.8809	0.271782	1000.14	-2.29	0.87	0.92	9.95181	0.874976	0.0265854	0.5	0	3.51626	1.30815	20.1104	2	4.64486	1	9.28972	17.2176	20.1104	14.7893	1199.45	1179.44	8.2324	10.5514	41.7332	53.4892	300.054	1211.05	0.148321	99.9451	-6.5622	-0.092605	0.25	-1.35514	7.35514	1	0	0.16	111115	6508.5
50614	19511937	blau	high-light	WT	9	08:32:05	2084	0	25.9198	0.26339	1776.08	-2.29	0.87	0.92	9.95181	0.874976	0.0266234	0.5	0	3.43542	1.31772	20.1385	2	4.64486	1	9.28972	17.2209	20.1385	14.7907	1999.28	1977.48	8.23039	10.4961	41.7166	53.2006	300.069	1210.99	0.175057	99.9506	-18.0681	-0.0593428	0.25	-1.35514	7.35514	1	0	0.16	111115	6724.5
50614	19511939	blau	highlight	WT	Obs	HHMMSS	FTime	EBal?	Photo	Cond	Ci	Adark	RedAbs	BlueAbs	%Blue	LeafAbs	PhiCO2	PS2/1	ETR	Trmmol	VpdL	CTleaf	Area	BLC_1	StmRat	BLCond	Tair	Tleaf	TBlk	CO2R	CO2S	H2OR	H2OS	RH_R	RH_S	Flow	PARi	PARo	Press	CsMch	HsMch	StableF	BLCslope	BLCoffst	f_parin	f_parout	alphaK	Status	Time
50614	19511939	blau	highlight	WT	in	in	in	in	out	out	out	in	in	in	in	out	out	in	out	out	out	out	in	out	in	out	in	in	in	in	in	in	in	in	in	in	in	in	in	in	in	in	in	in	in	in	in	in	in
50614	19511939	blau	highlight	WT	1	08:42:59	370.5	0	11.8875	0.151659	256.373	-2.29	0.87	0.92	9.95181	0.874976	0.0133957	0.5	0	2.21911	1.46027	21.0057	2	4.64486	1	9.28972	17.3783	21.0057	14.6615	399.727	391.225	8.9056	10.3693	44.697	52.0434	300.069	1209.59	0.194227	99.9619	1.30529	-0.25139	0.5	-1.35514	7.35514	1	0	0.16	111115	7378.5
50614	19511939	blau	highlight	WT	2	08:45:09	500.5	0	5.11856	0.137815	132.152	-2.29	0.87	0.92	9.95181	0.874976	0.00699901	0.5	0	1.98619	1.43661	20.7448	2	4.64486	1	9.28972	16.8797	20.7448	14.124	199.837	196.166	8.89801	10.2083	46.0919	52.8792	300.07	1209.77	0.147311	99.963	1.37794	-0.244108	0.5	-1.35514	7.35514	1	0	0.16	111115	7508.5
50614	19511939	blau	highlight	WT	3	08:47:36	648	0	1.21614	0.133454	82.6491	-2.29	0.87	0.92	9.95181	0.874976	0.00331228	0.5	0	1.89752	1.41695	20.5689	2	4.64486	1	9.28972	16.5988	20.5689	13.8418	100.443	99.5065	8.88789	10.1397	46.8693	53.4708	300.08	1209.78	0.109474	99.9656	1.29059	-0.251567	0.75	-1.35514	7.35514	1	0	0.16	111115	7656
50614	19511939	blau	highlight	WT	4	08:49:20	751.5	0	0.8341	0.138597	71.4066	-2.29	0.87	0.92	9.95181	0.874976	0.00295169	0.5	0	1.94614	1.40025	20.471	2	4.64486	1	9.28972	16.4902	20.471	13.7396	83.5779	82.9144	8.87593	10.1598	47.1331	53.9508	300.082	1209.65	0.174552	99.9709	1.24859	-0.250007	0.5	-1.35514	7.35514	1	0	0.16	111135	7759.5
50614	19511939	blau	highlight	WT	5	08:51:24	875.5	0	-2.43955	0.147723	28.0369	-2.29	0.87	0.92	9.95181	0.874976	-0.000141294	0.5	0	2.04504	1.38196	20.3809	2	4.64486	1	9.28972	16.4192	20.3809	13.6796	-0.0371946	1.58663	8.85925	10.2084	47.2589	54.4557	300.069	1209.67	0.124609	99.9741	0.489888	-0.266897	0.75	-1.35514	7.35514	1	0	0.16	111105	7883.5
50614	19511939	blau	highlight	WT	6	08:54:58	1089.5	0	14.4446	0.170472	246.676	-2.29	0.87	0.92	9.95181	0.874976	0.0158068	0.5	0	2.29821	1.34899	20.2572	2	4.64486	1	9.28972	16.3645	20.2572	13.6254	401.596	391.368	8.83977	10.3557	47.3175	55.432	300.068	1209.97	0.213398	99.9696	1.39159	-0.246971	0.25	-1.35514	7.35514	1	0	0.16	111115	8097.5
50614	19511939	blau	highlight	WT	7	08:58:18	1290	0	24.6988	0.209102	574.18	-2.29	0.87	0.92	9.95181	0.874976	0.0254927	0.5	0	2.71911	1.30637	20.1413	2	4.64486	1	9.28972	16.339	20.1413	13.6038	799.063	781.184	8.81928	10.6125	47.2815	56.895	300.055	1209.96	0.235091	99.963	-1.85249	-0.166824	0.5	-1.35514	7.35514	1	0	0.16	111115	8298
50614	19511939	blau	highlight	WT	8	09:01:53	1504.5	0	24.478	0.249278	999.119	-2.29	0.87	0.92	9.95181	0.874976	0.0252842	0.5	0	3.13929	1.2705	20.0679	2	4.64486	1	9.28972	16.3122	20.0679	13.578	1201.11	1182.33	8.79363	10.8632	47.2277	58.3427	300.083	1209.96	0.127634	99.9701	-6.70368	-0.117625	0.25	-1.35514	7.35514	1	0	0.16	111115	8512.5
50614	19511939	blau	highlight	WT	9	09:04:40	1672	0	26.5107	0.271541	1780.25	-2.29	0.87	0.92	9.95181	0.874976	0.0272024	0.5	0	3.35587	1.2497	20.0086	2	4.64486	1	9.28972	16.3047	20.0086	13.5773	2000.56	1978.46	8.77268	10.9847	47.1382	59.0242	300.084	1210.04	0.132174	99.9713	-18.6087	-0.0869974	0.25	-1.35514	7.35514	1	0	0.16	111115	8680
50614	19602541	gelb	high-light	WT	Obs	HHMMSS	FTime	EBal?	Photo	Cond	Ci	Adark	RedAbs	BlueAbs	%Blue	LeafAbs	PhiCO2	PS2/1	ETR	Trmmol	VpdL	CTleaf	Area	BLC_1	StmRat	BLCond	Tair	Tleaf	TBlk	CO2R	CO2S	H2OR	H2OS	RH_R	RH_S	Flow	PARi	PARo	Press	CsMch	HsMch	StableF	BLCslope	BLCoffst	f_parin	f_parout	alphaK	Status	Time
50614	19602541	gelb	high-light	WT	in	in	in	in	out	out	out	in	in	in	in	out	out	in	out	out	out	out	in	out	in	out	in	in	in	in	in	in	in	in	in	in	in	in	in	in	in	in	in	in	in	in	in	in	in
50614	19602541	gelb	high-light	WT	1	09:26:02	422	0	20.632	0.517784	311.242	-2.29	0.87	0.92	9.95181	0.874976	0.0216503	0.5	0	6.24703	1.24974	20.8994	2	4.64486	1	9.28972	18.0431	20.8994	15.406	400.438	385.082	8.19865	12.3115	39.4643	59.2615	300.041	1210.02	0.155887	99.9718	-0.040081	-0.213254	0.25	-1.35514	7.35514	1	0	0.16	111115	9961.5
50614	19602541	gelb	high-light	WT	2	09:29:16	616	0	9.59672	0.51145	157.548	-2.29	0.87	0.92	9.95181	0.874976	0.0112273	0.5	0	5.94724	1.20427	20.4881	2	4.64486	1	9.28972	17.0509	20.4881	14.3116	199.553	192.394	8.22892	12.145	42.1717	62.2407	300.049	1210.02	0.185147	99.9771	0.971104	-0.218583	0.5	-1.35514	7.35514	1	0	0.16	111115	10155.5
50614	19602541	gelb	high-light	WT	3	09:31:45	765	0	3.30062	0.493703	84.9582	-2.29	0.87	0.92	9.95181	0.874976	0.0052797	0.5	0	5.69579	1.19294	20.3104	2	4.64486	1	9.28972	16.7012	20.3104	13.9578	100.478	97.9062	8.24309	11.9941	43.1929	62.8477	300.053	1210.19	0.193723	99.9796	0.835087	-0.222188	0.5	-1.35514	7.35514	1	0	0.16	111115	10304.5
50614	19602541	gelb	high-light	WT	4	09:33:44	884.5	0	2.20285	0.483246	69.2291	-2.29	0.87	0.92	9.95181	0.874976	0.00424328	0.5	0	5.56168	1.18899	20.2253	2	4.64486	1	9.28972	16.5307	20.2253	13.7897	80.0244	78.2659	8.24434	11.9073	43.6731	63.0769	300.057	1210.11	0.204316	99.9862	0.694347	-0.223555	0.75	-1.35514	7.35514	1	0	0.16	111135	10424
50614	19602541	gelb	high-light	WT	5	09:36:00	1020.5	0	-3.75718	0.479095	15.3761	-2.29	0.87	0.92	9.95181	0.874976	-0.00138554	0.5	0	5.48701	1.18284	20.1513	2	4.64486	1	9.28972	16.3942	20.1513	13.6564	-0.0503187	2.44491	8.24579	11.8595	44.0642	63.3754	300.074	1210.23	0.13823	99.991	0.340648	-0.2331	0.75	-1.35514	7.35514	1	0	0.16	111105	10560
50614	19602541	gelb	high-light	WT	6	09:39:15	1215.5	0	19.059	0.477022	314.205	-2.29	0.87	0.92	9.95181	0.874976	0.0201581	0.5	0	5.38531	1.16589	19.9898	2	4.64486	1	9.28972	16.2948	19.9898	13.5617	401.652	387.559	8.24682	11.7936	44.3493	63.4228	300.095	1210.41	0.160426	99.9906	0.0636704	-0.182031	0.25	-1.35514	7.35514	1	0	0.16	111115	10755
50614	19602541	gelb	high-light	WT	7	09:42:53	1433.5	0	24.9351	0.472403	678.305	-2.29	0.87	0.92	9.95181	0.874976	0.025708	0.5	0	5.30529	1.15928	19.9093	2	4.64486	1	9.28972	16.2389	19.9093	13.5031	799.488	780.11	8.24894	11.7435	44.5167	63.3758	300.063	1210.34	0.178585	99.9852	-3.0985	-0.14969	0.25	-1.35514	7.35514	1	0	0.16	111115	10973
50614	19602541	gelb	high-light	WT	8	09:46:31	1651.5	0	23.3649	0.467037	1075.77	-2.29	0.87	0.92	9.95181	0.874976	0.024224	0.5	0	5.25351	1.16066	19.9019	2	4.64486	1	9.28972	16.2043	19.9019	13.4695	1200.14	1180.44	8.25736	11.7179	44.665	63.3833	300.069	1210.4	0.163958	99.9956	-7.08117	-0.128551	0.5	-1.35514	7.35514	1	0	0.16	111115	11191
50614	19602541	gelb	high-light	WT	9	09:50:09	1869.5	0	25.9232	0.439591	1841.37	-2.29	0.87	0.92	9.95181	0.874976	0.0266353	0.5	0	5.03435	1.17839	19.9306	2	4.64486	1	9.28972	16.1856	19.9306	13.4488	1999.84	1975.94	8.26573	11.5823	44.7628	62.7234	300.075	1210.59	0.188171	99.9938	-19.4601	-0.0820879	0.75	-1.35514	7.35514	1	0	0.16	111115	11409
30614	1956122	grün	high-light	Spe	Obs	HHMMSS	FTime	EBal?	Photo	Cond	Ci	Adark	RedAbs	BlueAbs	%Blue	LeafAbs	PhiCO2	PS2/1	ETR	Trmmol	VpdL	CTleaf	Area	BLC_1	StmRat	BLCond	Tair	Tleaf	TBlk	CO2R	CO2S	H2OR	H2OS	RH_R	RH_S	Flow	PARi	PARo	Press	CsMch	HsMch	StableF	BLCslope	BLCoffst	f_parin	f_parout	alphaK	Status	Time
30614	1956122	grün	high-light	Spe	in	in	in	in	out	out	out	in	in	in	in	out	out	in	out	out	out	out	in	out	in	out	in	in	in	in	in	in	in	in	in	in	in	in	in	in	in	in	in	in	in	in	in	in	in
30614	1956122	grün	high-light	Spe	1	11:45:50	257.5	0	17.2809	0.461283	317.911	-2.29	0.87	0.92	9.95181	0.874976	0.0184759	0.5	0	5.19505	1.1632	20.8852	2	4.64486	1	9.28972	17.8103	20.8852	15.1484	399.879	387.021	9.69604	13.1132	47.5135	64.2587	300.068	1210.62	0.12259	100.294	-0.605518	-0.248229	0.5	-1.35514	7.35514	1	0	0.16	111115	15256
30614	1956122	grün	high-light	Spe	2	11:49:27	474	0	9.20198	0.456509	155.997	-2.29	0.87	0.92	9.95181	0.874976	0.0108507	0.5	0	4.9493	1.11962	20.4986	2	4.64486	1	9.28972	17.0335	20.4986	14.3161	199.527	192.758	9.7104	12.9664	49.9764	66.7339	300.072	1210.44	0.10241	100.293	0.178875	-0.257164	0.75	-1.35514	7.35514	1	0	0.16	111115	15472.5
30614	1956122	grün	high-light	Spe	3	11:51:37	604	0	3.03305	0.45599	85.1623	-2.29	0.87	0.92	9.95181	0.874976	0.00502485	0.5	0	4.88064	1.10539	20.3788	2	4.64486	1	9.28972	16.8316	20.3788	14.1228	100.226	97.8854	9.7195	12.9306	50.6671	67.4065	300.052	1210.71	0.128138	100.292	0.299564	-0.269617	0.25	-1.35514	7.35514	1	0	0.16	111115	15602.5
30614	1956122	grün	high-light	Spe	4	11:53:25	712	0	3.01495	0.459288	78.7811	-2.29	0.87	0.92	9.95181	0.874976	0.00500737	0.5	0	4.86275	1.09388	20.2953	2	4.64486	1	9.28972	16.718	20.2953	14.0151	93.535	91.2297	9.72269	12.9221	51.0508	67.8498	300.052	1210.81	0.0807169	100.293	0.223278	-0.266469	0.75	-1.35514	7.35514	1	0	0.16	111135	15710.5
30614	1956122	grün	high-light	Spe	5	11:55:34	841	0	-3.21508	0.465438	13.1951	-2.29	0.87	0.92	9.95181	0.874976	-0.000873122	0.5	0	4.87174	1.08216	20.2203	2	4.64486	1	9.28972	16.6208	20.2203	13.9235	-0.337412	1.79969	9.72346	12.9286	51.3714	68.3051	300.062	1210.9	0.150336	100.293	-0.12682	-0.283927	0.75	-1.35514	7.35514	1	0	0.16	111105	15839.5
30614	1956122	grün	high-light	Spe	6	11:59:11	1058	0	16.9216	0.474914	323.569	-2.29	0.87	0.92	9.95181	0.874976	0.0181259	0.5	0	4.87186	1.06162	20.0857	2	4.64486	1	9.28972	16.5492	20.0857	13.8451	401.721	389.179	9.73289	12.938	51.651	68.6602	300.069	1211.35	0.193217	100.283	-0.67278	-0.234493	0.25	-1.35514	7.35514	1	0	0.16	111115	16056.5
30614	1956122	grün	high-light	Spe	7	12:01:36	1203	0	20.5837	0.479422	698.805	-2.29	0.87	0.92	9.95181	0.874976	0.0215825	0.5	0	4.86978	1.05172	20.0115	2	4.64486	1	9.28972	16.496	20.0115	13.791	799.371	783.11	9.72548	12.9293	51.7853	68.8445	300.07	1211.26	0.122084	100.281	-3.96575	-0.201066	0.5	-1.35514	7.35514	1	0	0.16	111115	16201.5
30614	1956122	grün	high-light	Spe	8	12:04:27	1374	0	22.4273	0.474077	1082.65	-2.29	0.87	0.92	9.95181	0.874976	0.0233197	0.5	0	4.8283	1.05396	19.9949	2	4.64486	1	9.28972	16.4426	19.9949	13.7289	1199.65	1180.9	9.70629	12.883	51.8585	68.8309	300.067	1211.39	0.135706	100.28	-8.65545	-0.17495	0.5	-1.35514	7.35514	1	0	0.16	111115	16372.5
30614	1956122	grün	high-light	Spe	9	12:08:04	1591	0	23.8725	0.440068	1853.8	-2.29	0.87	0.92	9.95181	0.874976	0.0246892	0.5	0	4.60039	1.07804	20.0531	2	4.64486	1	9.28972	16.4129	20.0531	13.6992	1999.43	1977.46	9.70072	12.7279	51.9245	68.1281	300.068	1211.09	0.140245	100.276	-20.9798	-0.129635	0.25	-1.35514	7.35514	1	0	0.16	111115	16589.5
30614	1961129	rot	high-light	Spe	Obs	HHMMSS	FTime	EBal?	Photo	Cond	Ci	Adark	RedAbs	BlueAbs	%Blue	LeafAbs	PhiCO2	PS2/1	ETR	Trmmol	VpdL	CTleaf	Area	BLC_1	StmRat	BLCond	Tair	Tleaf	TBlk	CO2R	CO2S	H2OR	H2OS	RH_R	RH_S	Flow	PARi	PARo	Press	CsMch	HsMch	StableF	BLCslope	BLCoffst	f_parin	f_parout	alphaK	Status	Time
30614	1961129	rot	high-light	Spe	in	in	in	in	out	out	out	in	in	in	in	out	out	in	out	out	out	out	in	out	in	out	in	in	in	in	in	in	in	in	in	in	in	in	in	in	in	in	in	in	in	in	in	in	in
30614	1961129	rot	high-light	Spe	1	11:08:59	296.5	0	2.23844	0.0262303	253.462	-2.29	0.87	0.92	9.95181	0.874976	0.00427729	0.5	0	0.423631	1.59548	21.8028	2	4.64486	1	9.28972	17.5674	21.8028	14.9238	400.385	398.78	9.94918	10.2287	49.5261	50.9174	300.057	1210	0.113005	100.334	-0.966249	-0.101368	0.75	-1.35514	7.35514	1	0	0.16	111115	13045
30614	1961129	rot	high-light	Spe	2	11:11:17	434.5	0	0.329969	0.0281223	176.29	-2.29	0.87	0.92	9.95181	0.874976	0.00247445	0.5	0	0.441577	1.55183	21.5221	2	4.64486	1	9.28972	17.1187	21.5221	14.4136	200.128	199.849	9.92793	10.2192	50.8411	52.3329	300.069	1210.1	0.102411	100.333	-0.00877571	-0.119497	0.75	-1.35514	7.35514	1	0	0.16	111115	13183
30614	1961129	rot	high-light	Spe	3	11:13:18	555.5	0	-0.533751	0.0305139	125.898	-2.29	0.87	0.92	9.95181	0.874976	0.00165859	0.5	0	0.467663	1.51534	21.288	2	4.64486	1	9.28972	16.9013	21.288	14.196	100.292	100.617	9.90887	10.2174	51.4466	53.0484	300.072	1210.19	0.0948427	100.331	0.121656	-0.13153	0.75	-1.35514	7.35514	1	0	0.16	111115	13304
30614	1961129	rot	high-light	Spe	4	11:14:46	643.5	0	-0.286772	0.0326177	105.61	-2.29	0.87	0.92	9.95181	0.874976	0.00189187	0.5	0	0.493102	1.49521	21.1583	2	4.64486	1	9.28972	16.8031	21.1583	14.1001	93.7606	93.9208	9.89186	10.2172	51.6794	53.379	300.066	1210.16	0.118049	100.332	0.0651913	-0.133318	0.75	-1.35514	7.35514	1	0	0.16	111135	13392
30614	1961129	rot	high-light	Spe	5	11:17:06	783.5	0	-1.14115	0.0342262	53.4158	-2.29	0.87	0.92	9.95181	0.874976	0.00108526	0.5	0	0.515324	1.48954	21.1121	2	4.64486	1	9.28972	16.7065	21.1121	14.0031	-0.206922	0.553514	9.86221	10.2022	51.8435	53.6307	300.054	1209.85	0.159417	100.336	-0.485708	-0.163546	0.5	-1.35514	7.35514	1	0	0.16	111105	13532
30614	1961129	rot	high-light	Spe	6	11:20:24	981	0	4.70035	0.0410351	207.024	-2.29	0.87	0.92	9.95181	0.874976	0.00660059	0.5	0	0.60349	1.4561	20.9084	2	4.64486	1	9.28972	16.6208	20.9084	13.921	401.428	398.135	9.82643	10.2246	51.9337	54.0378	300.071	1210.38	0.145291	100.328	-0.753469	-0.111264	0.5	-1.35514	7.35514	1	0	0.16	111115	13729.5
30614	1961129	rot	high-light	Spe	7	11:23:34	1171.5	0	10.3153	0.0463612	421.661	-2.29	0.87	0.92	9.95181	0.874976	0.0119032	0.5	0	0.677488	1.44758	20.8586	2	4.64486	1	9.28972	16.5718	20.8586	13.8753	800.68	793.447	9.78798	10.2349	51.8864	54.2556	300.077	1210.31	0.132678	100.318	-3.80504	-0.0856219	0.5	-1.35514	7.35514	1	0	0.16	111115	13920
30614	1961129	rot	high-light	Spe	8	11:26:32	1349	0	15.3584	0.0526054	697.507	-2.29	0.87	0.92	9.95181	0.874976	0.016663	0.5	0	0.759696	1.43156	20.7683	2	4.64486	1	9.28972	16.5496	20.7683	13.8487	1199.64	1188.8	9.75705	10.2582	51.7944	54.4548	300.06	1210.48	0.142769	100.315	-8.05382	-0.0711098	0.5	-1.35514	7.35514	1	0	0.16	111115	14097.5
30614	1961129	rot	high-light	Spe	9	11:30:04	1561	0	18.4964	0.0602672	1453.78	-2.29	0.87	0.92	9.95181	0.874976	0.0196234	0.5	0	0.862017	1.41905	20.7082	2	4.64486	1	9.28972	16.5205	20.7082	13.8229	2000.62	1987.15	9.72382	10.2924	51.7129	54.7369	300.081	1210.62	0.0469165	100.314	-19.998	-0.04488	0.25	-1.35514	7.35514	1	0	0.16	111115	14309.5
40614	1956123	grün	high-light	Spe	Obs	HHMMSS	FTime	EBal?	Photo	Cond	Ci	Adark	RedAbs	BlueAbs	%Blue	LeafAbs	PhiCO2	PS2/1	ETR	Trmmol	VpdL	CTleaf	Area	BLC_1	StmRat	BLCond	Tair	Tleaf	TBlk	CO2R	CO2S	H2OR	H2OS	RH_R	RH_S	Flow	PARi	PARo	Press	CsMch	HsMch	StableF	BLCslope	BLCoffst	f_parin	f_parout	alphaK	Status	Time
40614	1956123	grün	high-light	Spe	in	in	in	in	out	out	out	in	in	in	in	out	out	in	out	out	out	out	in	out	in	out	in	in	in	in	in	in	in	in	in	in	in	in	in	in	in	in	in	in	in	in	in	in	in
40614	1956123	grün	high-light	Spe	1	10:52:11	402	0	9.73623	0.220824	314.398	-2.29	0.87	0.92	9.95181	0.874976	0.0113443	0.5	0	2.41515	1.09223	21.5987	2	4.64486	1	9.28972	17.3409	21.5987	14.5762	399.813	392.691	13.4462	15.0318	67.3948	75.3419	300.065	1211.59	0.142265	99.5908	-0.253012	-0.367861	0.25	-1.35514	7.35514	1	0	0.16	111115	734
40614	1956123	grün	high-light	Spe	2	10:54:58	569	0	4.96667	0.222066	156.854	-2.29	0.87	0.92	9.95181	0.874976	0.00684327	0.5	0	2.32839	1.04747	21.3127	2	4.64486	1	9.28972	16.8442	21.3127	14.0629	200.011	196.396	13.5015	15.0302	69.8332	77.7396	300.061	1211.93	0.193721	99.5887	0.323603	-0.405133	0.5	-1.35514	7.35514	1	0	0.16	111115	901
40614	1956123	grün	high-light	Spe	3	10:57:13	704	0	1.64768	0.225022	85.6539	-2.29	0.87	0.92	9.95181	0.874976	0.00371403	0.5	0	2.29561	1.0196	21.14	2	4.64486	1	9.28972	16.6422	21.14	13.867	100.402	99.1522	13.5337	15.0408	70.903	78.7987	300.055	1211.71	0.178081	99.5884	0.242228	-0.437456	0.25	-1.35514	7.35514	1	0	0.16	111115	1036
40614	1956123	grün	high-light	Spe	4	10:59:09	819.5	0	1.48244	0.230798	83.4858	-2.29	0.87	0.92	9.95181	0.874976	0.00355727	0.5	0	2.30586	0.999188	21.0269	2	4.64486	1	9.28972	16.5223	21.0269	13.7638	96.5767	95.4419	13.5573	15.071	71.5693	79.5605	300.062	1212.02	0.131166	99.5869	0.238024	-0.429429	0.75	-1.35514	7.35514	1	0	0.16	111135	1151.5
40614	1956123	grün	high-light	Spe	5	11:02:36	1027	0	-2.27072	0.204298	18.867	-2.29	0.87	0.92	9.95181	0.874976	1.81769e-05	0.5	0	2.04606	0.998948	20.9275	2	4.64486	1	9.28972	16.4174	20.9275	13.6569	-0.602268	0.909964	13.5776	14.921	72.1538	79.2928	300.068	1212.14	0.132175	99.5835	-0.369848	-0.639896	0.25	-1.35514	7.35514	1	0	0.16	111105	1359
40614	1956123	grün	high-light	Spe	6	11:06:12	1243	0	10.2456	0.245675	320.197	-2.29	0.87	0.92	9.95181	0.874976	0.0118193	0.5	0	2.34801	0.957356	20.7868	2	4.64486	1	9.28972	16.3551	20.7868	13.5998	401.464	394.019	13.584	15.1253	72.4671	80.6894	300.074	1212.16	0.161434	99.573	-0.794592	-0.412507	0.5	-1.35514	7.35514	1	0	0.16	111115	1575
40614	1956123	grün	high-light	Spe	7	11:12:15	1606	0	12.51	0.417189	725.136	-2.29	0.87	0.92	9.95181	0.874976	0.013962	0.5	0	4.93252	1.20763	20.4728	2	4.64486	1	9.28972	16.4703	20.4728	13.6882	800.774	789.84	8.89112	12.1388	47.0805	64.278	300.065	1211.49	0.101401	99.5631	-3.86924	-0.169588	0.5	-1.35514	7.35514	1	0	0.16	111115	1938
40614	1956123	grün	high-light	Spe	8	11:15:19	1789.5	0	13.1175	0.413074	1111.96	-2.29	0.87	0.92	9.95181	0.874976	0.0145302	0.5	0	4.86961	1.20358	20.4542	2	4.64486	1	9.28972	16.4621	20.4542	13.6902	1199.81	1187.21	8.94573	12.1519	47.3937	64.3795	300.077	1211.89	0.191198	99.5612	-8.30955	-0.149412	0.5	-1.35514	7.35514	1	0	0.16	111115	2121.5
40614	1956123	grün	high-light	Spe	9	11:18:15	1965.5	0	14.608	0.391385	1883.45	-2.29	0.87	0.92	9.95181	0.874976	0.0159338	0.5	0	4.66137	1.2132	20.4477	2	4.64486	1	9.28972	16.4217	20.4477	13.6608	1999.39	1983.5	8.97707	12.0466	47.6779	63.9802	300.064	1212.05	0.118553	99.5524	-20.2336	-0.110225	0.75	-1.35514	7.35514	1	0	0.16	111115	2297.5
40614	1961127	rot	high-light	Spe	Obs	HHMMSS	FTime	EBal?	Photo	Cond	Ci	Adark	RedAbs	BlueAbs	%Blue	LeafAbs	PhiCO2	PS2/1	ETR	Trmmol	VpdL	CTleaf	Area	BLC_1	StmRat	BLCond	Tair	Tleaf	TBlk	CO2R	CO2S	H2OR	H2OS	RH_R	RH_S	Flow	PARi	PARo	Press	CsMch	HsMch	StableF	BLCslope	BLCoffst	f_parin	f_parout	alphaK	Status	Time
40614	1961127	rot	high-light	Spe	in	in	in	in	out	out	out	in	in	in	in	out	out	in	out	out	out	out	in	out	in	out	in	in	in	in	in	in	in	in	in	in	in	in	in	in	in	in	in	in	in	in	in	in	in
40614	1961127	rot	high-light	Spe	1	09:17:18	458	0	9.92848	0.123561	256.286	-2.29	0.87	0.92	9.95181	0.874976	0.0115482	0.5	0	1.54008	1.23219	22.0203	2	4.64486	1	9.28972	17.7028	22.0203	14.9957	399.883	392.861	13.2912	14.303	65.1207	70.0786	300.043	1209.22	0.198262	99.6019	0.681135	-0.384819	0.25	-1.35514	7.35514	1	0	0.16	111115	10711
40614	1961127	rot	high-light	Spe	2	09:19:26	586	0	4.53626	0.134192	139.143	-2.29	0.87	0.92	9.95181	0.874976	0.00645191	0.5	0	1.60859	1.18659	21.7597	2	4.64486	1	9.28972	17.2788	21.7597	14.5257	200.399	197.164	13.2834	14.3403	66.8465	72.1649	300.044	1209.2	0.11704	99.5994	0.996305	-0.414484	0.5	-1.35514	7.35514	1	0	0.16	111115	10839
40614	1961127	rot	high-light	Spe	3	09:21:58	737.5	0	1.10509	0.152044	85.6191	-2.29	0.87	0.92	9.95181	0.874976	0.00320857	0.5	0	1.73839	1.13412	21.4762	2	4.64486	1	9.28972	16.9973	21.4762	14.2444	99.9762	99.1247	13.2738	14.4158	67.9988	73.8491	300.054	1209.33	0.118049	99.5984	0.756224	-0.438162	0.5	-1.35514	7.35514	1	0	0.16	111115	10990.5
40614	1961127	rot	high-light	Spe	4	09:23:32	831.5	0	1.00731	0.160241	84.7015	-2.29	0.87	0.92	9.95181	0.874976	0.00311589	0.5	0	1.806	1.11901	21.4017	2	4.64486	1	9.28972	16.8968	21.4017	14.1491	97.3542	96.5666	13.2634	14.4498	68.3815	74.4981	300.057	1209.43	0.137221	99.6014	0.820799	-0.450811	1	-1.35514	7.35514	1	0	0.16	111135	11084.5
40614	1961127	rot	high-light	Spe	5	09:25:47	967	0	-2.87171	0.180124	27.4723	-2.29	0.87	0.92	9.95181	0.874976	-0.000549696	0.5	0	1.9596	1.08254	21.2196	2	4.64486	1	9.28972	16.7936	21.2196	14.048	-0.11256	1.79915	13.2435	14.5306	68.7279	75.4076	300.064	1209.44	0.105942	99.6019	0.189108	-0.414207	0.5	-1.35514	7.35514	1	0	0.16	111105	11220
40614	1961127	rot	high-light	Spe	6	09:29:22	1182	0	11.9579	0.186823	283.108	-2.29	0.87	0.92	9.95181	0.874976	0.0134622	0.5	0	1.98561	1.05844	21.0499	2	4.64486	1	9.28972	16.7043	21.0499	13.9609	401.621	393.13	13.2056	14.51	68.9185	75.7257	300.047	1209.59	0.148825	99.5979	0.280569	-0.367532	0.5	-1.35514	7.35514	1	0	0.16	111115	11435
40614	1961127	rot	high-light	Spe	7	09:32:22	1362	0	18.4446	0.185427	611.857	-2.29	0.87	0.92	9.95181	0.874976	0.0195919	0.5	0	1.9887	1.06789	21.0903	2	4.64486	1	9.28972	16.6883	21.0903	13.9393	799.264	785.928	13.1713	14.4776	68.8086	75.6332	300.058	1209.55	0.205831	99.5972	-2.99891	-0.325665	0.5	-1.35514	7.35514	1	0	0.16	111115	11615
40614	1961127	rot	high-light	Spe	8	09:35:57	1577	0	18.8312	0.182727	998.309	-2.29	0.87	0.92	9.95181	0.874976	0.0199585	0.5	0	1.96189	1.06878	21.0529	2	4.64486	1	9.28972	16.6709	21.0529	13.9198	1199.15	1185.05	13.1225	14.4114	68.6273	75.3676	300.053	1209.47	0.153362	99.5937	-7.06642	-0.304427	0.25	-1.35514	7.35514	1	0	0.16	111115	11830
40614	1961127	rot	high-light	Spe	9	09:39:32	1791.5	0	20.6516	0.158231	1739.1	-2.29	0.87	0.92	9.95181	0.874976	0.021676	0.5	0	1.74514	1.09507	21.102	2	4.64486	1	9.28972	16.6636	21.102	13.9144	2000.37	1984.3	13.077	14.2236	68.4193	74.4184	300.068	1209.61	0.142768	99.5909	-19.0443	-0.296666	0.25	-1.35514	7.35514	1	0	0.16	111115	12044.5
40614	1961128	rot	high-light	Spe	Obs	HHMMSS	FTime	EBal?	Photo	Cond	Ci	Adark	RedAbs	BlueAbs	%Blue	LeafAbs	PhiCO2	PS2/1	ETR	Trmmol	VpdL	CTleaf	Area	BLC_1	StmRat	BLCond	Tair	Tleaf	TBlk	CO2R	CO2S	H2OR	H2OS	RH_R	RH_S	Flow	PARi	PARo	Press	CsMch	HsMch	StableF	BLCslope	BLCoffst	f_parin	f_parout	alphaK	Status	Time
40614	1961128	rot	high-light	Spe	in	in	in	in	out	out	out	in	in	in	in	out	out	in	out	out	out	out	in	out	in	out	in	in	in	in	in	in	in	in	in	in	in	in	in	in	in	in	in	in	in	in	in	in	in
40614	1961128	rot	high-light	Spe	1	11:57:18	252.5	0	16.8142	0.318277	293.457	-2.29	0.87	0.92	9.95181	0.874976	0.0180202	0.5	0	4.32768	1.3738	21.3698	2	4.64486	1	9.28972	17.8254	21.3698	15.1466	400.42	388.094	8.99671	11.847	43.7199	57.571	300.068	1211.64	0.19473	99.5546	0.0115604	-0.187154	0.25	-1.35514	7.35514	1	0	0.16	111115	4641
40614	1961128	rot	high-light	Spe	2	12:00:56	470.5	0	8.89573	0.443482	156.627	-2.29	0.87	0.92	9.95181	0.874976	0.0105495	0.5	0	5.24814	1.21143	20.7215	2	4.64486	1	9.28972	17.2201	20.7215	14.4956	200.089	193.483	9.0223	12.4768	45.5509	62.9914	300.055	1211.81	0.203811	99.5527	0.727304	-0.237298	0.25	-1.35514	7.35514	1	0	0.16	111115	4859
40614	1961128	rot	high-light	Spe	3	12:04:37	691	0	3.07375	0.527532	86.7683	-2.29	0.87	0.92	9.95181	0.874976	0.00505811	0.5	0	5.74229	1.12405	20.3738	2	4.64486	1	9.28972	17.006	20.3738	14.2814	100.658	98.2336	9.05291	12.8314	46.3303	65.6678	300.044	1211.95	0.312779	99.555	0.640825	-0.260885	0.75	-1.35514	7.35514	1	0	0.16	111115	5079.5
40614	1961128	rot	high-light	Spe	4	12:06:42	816	0	1.72287	0.545826	70.419	-2.29	0.87	0.92	9.95181	0.874976	0.00378421	0.5	0	5.83179	1.10551	20.3011	2	4.64486	1	9.28972	16.9374	20.3011	14.2223	78.4951	77.0473	9.07125	12.9082	46.6316	66.3556	300.059	1211.95	0.181106	99.5662	0.48044	-0.267964	0.75	-1.35514	7.35514	1	0	0.16	111135	5204.5
40614	1961128	rot	high-light	Spe	5	12:08:56	950	0	-3.90114	0.556055	13.9732	-2.29	0.87	0.92	9.95181	0.874976	-0.00151935	0.5	0	5.8758	1.0948	20.2566	2	4.64486	1	9.28972	16.894	20.2566	14.1745	-0.273743	2.31743	9.0808	12.9465	46.8213	66.7532	300.06	1211.94	0.2028	99.5914	0.174597	-0.280526	0.5	-1.35514	7.35514	1	0	0.16	111105	5338.5
40614	1961128	rot	high-light	Spe	6	12:12:37	1171	0	17.5169	0.549706	328.872	-2.29	0.87	0.92	9.95181	0.874976	0.0186724	0.5	0	5.74594	1.08277	20.1279	2	4.64486	1	9.28972	16.8264	20.1279	14.1166	401.91	388.746	9.0929	12.8734	47.1002	66.6828	300.064	1212.33	0.156389	99.6233	-0.115442	-0.232102	0.25	-1.35514	7.35514	1	0	0.16	111115	5559.5
40614	1961128	rot	high-light	Spe	7	12:16:10	1384	0	24.0635	0.523741	691.063	-2.29	0.87	0.92	9.95181	0.874976	0.0248406	0.5	0	5.53844	1.09277	20.1082	2	4.64486	1	9.28972	16.7981	20.1082	14.0869	800.103	781.18	9.09771	12.7422	47.217	66.1318	300.064	1212.5	0.226007	99.6384	-3.25222	-0.191717	0.5	-1.35514	7.35514	1	0	0.16	111115	5772.5
40614	1961128	rot	high-light	Spe	8	12:19:48	1602.5	0	25.3082	0.476588	1071.48	-2.29	0.87	0.92	9.95181	0.874976	0.0260091	0.5	0	5.1942	1.12078	20.1521	2	4.64486	1	9.28972	16.7712	20.1521	14.0592	1201.63	1180.68	9.10829	12.527	47.347	65.1179	300.067	1212.72	0.160424	99.6264	-7.53164	-0.164968	0.5	-1.35514	7.35514	1	0	0.16	111115	5991
40614	1961128	rot	high-light	Spe	9	12:23:25	1819	0	27.0416	0.407429	1828.49	-2.29	0.87	0.92	9.95181	0.874976	0.0276392	0.5	0	4.65509	1.16651	20.2443	2	4.64486	1	9.28972	16.748	20.2443	14.0378	1998.89	1974.74	9.1415	12.2064	47.58	63.5323	300.062	1212.87	0.175055	99.6063	-19.5498	-0.112996	0.25	-1.35514	7.35514	1	0	0.16	111115	6207.5
50614	1956121	grün	high-light	Spe	Obs	HHMMSS	FTime	EBal?	Photo	Cond	Ci	Adark	RedAbs	BlueAbs	%Blue	LeafAbs	PhiCO2	PS2/1	ETR	Trmmol	VpdL	CTleaf	Area	BLC_1	StmRat	BLCond	Tair	Tleaf	TBlk	CO2R	CO2S	H2OR	H2OS	RH_R	RH_S	Flow	PARi	PARo	Press	CsMch	HsMch	StableF	BLCslope	BLCoffst	f_parin	f_parout	alphaK	Status	Time
50614	1956121	grün	high-light	Spe	in	in	in	in	out	out	out	in	in	in	in	out	out	in	out	out	out	out	in	out	in	out	in	in	in	in	in	in	in	in	in	in	in	in	in	in	in	in	in	in	in	in	in	in	in
50614	1956121	grün	high-light	Spe	1	10:25:44	243.5	0	17.0277	0.370036	304.534	-2.29	0.87	0.92	9.95181	0.874976	0.0182183	0.5	0	4.67838	1.29104	20.7807	2	4.64486	1	9.28972	17.7466	20.7807	15.0777	400.473	387.914	8.63049	11.7121	42.346	57.4663	300.071	1211.86	0.195741	100.02	-0.398548	-0.171438	0.25	-1.35514	7.35514	1	0	0.16	111115	13543.5
50614	1956121	grün	high-light	Spe	2	10:28:02	382	0	7.7474	0.359897	154.788	-2.29	0.87	0.92	9.95181	0.874976	0.00946532	0.5	0	4.44251	1.25952	20.4913	2	4.64486	1	9.28972	17.1529	20.4913	14.4205	199.67	193.932	8.66544	11.5922	44.1418	59.0509	300.056	1211.96	0.170517	100.02	0.485073	-0.18339	0.25	-1.35514	7.35514	1	0	0.16	111115	13682
50614	1956121	grün	high-light	Spe	3	10:30:13	513	0	2.55135	0.362448	85.088	-2.29	0.87	0.92	9.95181	0.874976	0.00456504	0.5	0	4.34521	1.22381	20.2244	2	4.64486	1	9.28972	16.8425	20.2244	14.1077	100.533	98.5471	8.69142	11.5542	45.152	60.024	300.062	1212.06	0.167995	100.016	0.420078	-0.19224	0.75	-1.35514	7.35514	1	0	0.16	111115	13813
50614	1956121	grün	high-light	Spe	4	10:32:20	640	0	1.2917	0.365425	71.4838	-2.29	0.87	0.92	9.95181	0.874976	0.00337676	0.5	0	4.29662	1.20081	20.0584	2	4.64486	1	9.28972	16.6475	20.0584	13.9151	79.8777	78.7911	8.71006	11.5409	45.8135	60.7032	300.055	1212.25	0.191201	100.018	0.457966	-0.197099	1	-1.35514	7.35514	1	0	0.16	111135	13940
50614	1956121	grün	high-light	Spe	5	10:34:32	772	0	-3.30817	0.371182	16.6344	-2.29	0.87	0.92	9.95181	0.874976	-0.000960037	0.5	0	4.3023	1.18453	19.9585	2	4.64486	1	9.28972	16.5471	19.9585	13.8149	-0.133176	2.06583	8.72404	11.5584	46.1808	61.1847	300.07	1212.09	0.05852	100.018	-0.00308204	-0.205432	0.75	-1.35514	7.35514	1	0	0.16	111105	14072
50614	1956121	grün	high-light	Spe	6	10:37:57	977	0	17.3947	0.374507	305.927	-2.29	0.87	0.92	9.95181	0.874976	0.0185573	0.5	0	4.26482	1.16437	19.822	2	4.64486	1	9.28972	16.4511	19.822	13.7192	402.06	389.36	8.75271	11.5623	46.6189	61.5836	300.077	1212.32	0.132175	100.023	-0.300293	-0.1586	0.25	-1.35514	7.35514	1	0	0.16	111115	14277
50614	1956121	grün	high-light	Spe	7	10:41:30	1190	0	23.4373	0.373426	665.708	-2.29	0.87	0.92	9.95181	0.874976	0.024254	0.5	0	4.22107	1.15559	19.7658	2	4.64486	1	9.28972	16.3971	19.7658	13.662	800.963	783.138	8.78925	11.5703	46.9711	61.8332	300.052	1212.31	0.1912	100.016	-3.55255	-0.129947	0.5	-1.35514	7.35514	1	0	0.16	111115	14490
50614	1956121	grün	high-light	Spe	8	10:44:28	1368	0	24.2803	0.368396	1050.93	-2.29	0.87	0.92	9.95181	0.874976	0.0250427	0.5	0	4.16373	1.1549	19.7607	2	4.64486	1	9.28972	16.3682	19.7607	13.6361	1200.29	1180.83	8.82634	11.5693	47.2583	61.945	300.078	1212.6	0.193218	100.02	-7.96649	-0.109311	0.5	-1.35514	7.35514	1	0	0.16	111115	14668
50614	1956121	grün	high-light	Spe	9	10:46:53	1513	0	26.4877	0.359774	1819.62	-2.29	0.87	0.92	9.95181	0.874976	0.0271272	0.5	0	4.06441	1.1534	19.7274	2	4.64486	1	9.28972	16.3416	19.7274	13.6178	1999.79	1976.78	8.85868	11.5364	47.5124	61.8739	300.073	1212.43	0.183631	100.021	-20.1766	-0.0670208	0.25	-1.35514	7.35514	1	0	0.16	111115	14813
50614	1961129	rot	high-light	Spe	Obs	HHMMSS	FTime	EBal?	Photo	Cond	Ci	Adark	RedAbs	BlueAbs	%Blue	LeafAbs	PhiCO2	PS2/1	ETR	Trmmol	VpdL	CTleaf	Area	BLC_1	StmRat	BLCond	Tair	Tleaf	TBlk	CO2R	CO2S	H2OR	H2OS	RH_R	RH_S	Flow	PARi	PARo	Press	CsMch	HsMch	StableF	BLCslope	BLCoffst	f_parin	f_parout	alphaK	Status	Time
50614	1961129	rot	high-light	Spe	in	in	in	in	out	out	out	in	in	in	in	out	out	in	out	out	out	out	in	out	in	out	in	in	in	in	in	in	in	in	in	in	in	in	in	in	in	in	in	in	in	in	in	in	in
50614	1961129	rot	high-light	Spe	1	07:32:22	1341	0	2.32677	0.0252922	242.681	-2.29	0.87	0.92	9.95181	0.874976	0.00436279	0.5	0	0.385007	1.49615	21.8191	2	4.64486	1	9.28972	17.6613	21.8191	14.9745	399.691	398.038	11.0402	11.2939	54.3939	55.644	300.06	1209.42	0.229044	99.8959	-0.149598	-0.158096	0.5	-1.35514	7.35514	1	0	0.16	111115	3142
50614	1961129	rot	high-light	Spe	2	07:34:32	1471	0	0.763894	0.0334419	158.438	-2.29	0.87	0.92	9.95181	0.874976	0.00288539	0.5	0	0.487708	1.43507	21.4726	2	4.64486	1	9.28972	17.1422	21.4726	14.3923	199.859	199.285	11.0327	11.354	56.1715	57.8077	300.067	1209.63	0.116539	99.9007	0.810974	-0.183351	0.75	-1.35514	7.35514	1	0	0.16	111115	3272
50614	1961129	rot	high-light	Spe	3	07:36:09	1568	0	0.902479	0.0395296	61.8065	-2.29	0.87	0.92	9.95181	0.874976	0.00301635	0.5	0	0.565928	1.4099	21.3156	2	4.64486	1	9.28972	16.9172	21.3156	14.1659	100.972	100.332	10.9866	11.3595	56.7413	58.6674	300.055	1209.62	0.185654	99.9029	0.870407	-0.201754	0.75	-1.35514	7.35514	1	0	0.16	111115	3369
50614	1961129	rot	high-light	Spe	4	07:37:50	1669	0	-0.10342	0.0466433	92.0076	-2.29	0.87	0.92	9.95181	0.874976	0.00206511	0.5	0	0.652889	1.37975	21.1276	2	4.64486	1	9.28972	16.7486	21.1276	14.0056	90.4677	90.4973	10.9389	11.3691	57.1037	59.3494	300.081	1210.11	0.124106	99.9046	0.895355	-0.207146	0.75	-1.35514	7.35514	1	0	0.16	111135	3470
50614	1961129	rot	high-light	Spe	5	07:39:45	1784	0	-1.75681	0.0534132	53.289	-2.29	0.87	0.92	9.95181	0.874976	0.000503496	0.5	0	0.732131	1.35244	20.9481	2	4.64486	1	9.28972	16.5872	20.9481	13.8453	-0.167715	1.00273	10.8824	11.3649	57.4012	59.9458	300.07	1210.29	0.140753	99.9161	0.379748	-0.248543	0.5	-1.35514	7.35514	1	0	0.16	111105	3585
50614	1961129	rot	high-light	Spe	6	07:43:18	1997	0	7.48596	0.080002	239.184	-2.29	0.87	0.92	9.95181	0.874976	0.00922804	0.5	0	1.04139	1.28826	20.5878	2	4.64486	1	9.28972	16.3554	20.5878	13.629	401.939	396.674	10.7753	11.4614	57.6785	61.351	300.089	1210.75	0.159925	99.9121	0.413562	-0.203329	0.5	-1.35514	7.35514	1	0	0.16	111115	3798
50614	1961129	rot	high-light	Spe	7	07:46:51	2210	0	15.5738	0.112413	552.007	-2.29	0.87	0.92	9.95181	0.874976	0.0168577	0.5	0	1.40507	1.24143	20.3539	2	4.64486	1	9.28972	16.1846	20.3539	13.4646	800.642	789.522	10.6558	11.5815	57.6625	62.6714	300.074	1211.1	0.160428	99.9109	-2.35615	-0.20493	0.25	-1.35514	7.35514	1	0	0.16	111115	4011
50614	1961129	rot	high-light	Spe	8	07:50:25	2424	0	15.1338	0.153115	1006.44	-2.29	0.87	0.92	9.95181	0.874976	0.0164446	0.5	0	1.83712	1.1969	20.1758	2	4.64486	1	9.28972	16.088	20.1758	13.3641	1199.72	1188.18	10.5541	11.7642	57.4658	64.0544	300.074	1210.94	0.173545	99.9121	-6.73884	-0.215106	0.25	-1.35514	7.35514	1	0	0.16	111115	4225
50614	1961129	rot	high-light	Spe	9	07:52:56	2574.5	0	17.0549	0.181377	1797.46	-2.29	0.87	0.92	9.95181	0.874976	0.018256	0.5	0	2.13002	1.17497	20.1105	2	4.64486	1	9.28972	16.0534	20.1105	13.3284	2000.75	1986.57	10.4853	11.8881	57.2164	64.8712	300.069	1211.06	0.158915	99.9109	-18.9268	-0.197073	0.25	-1.35514	7.35514	1	0	0.16	111115	4375.5
50614	19511942	blau	low-light	WT	Obs	HHMMSS	FTime	EBal?	Photo	Cond	Ci	Adark	RedAbs	BlueAbs	%Blue	LeafAbs	PhiCO2	PS2/1	ETR	Trmmol	VpdL	CTleaf	Area	BLC_1	StmRat	BLCond	Tair	Tleaf	TBlk	CO2R	CO2S	H2OR	H2OS	RH_R	RH_S	Flow	PARi	PARo	Press	CsMch	HsMch	StableF	BLCslope	BLCoffst	f_parin	f_parout	alphaK	Status	Time
50614	19511942	blau	low-light	WT	in	in	in	in	out	out	out	in	in	in	in	out	out	in	out	out	out	out	in	out	in	out	in	in	in	in	in	in	in	in	in	in	in	in	in	in	in	in	in	in	in	in	in	in	in
50614	19511942	blau	low-light	WT	1	11:31:46	198.5	0	6.70493	0.0850364	259.924	-2.29	0.87	0.92	9.95181	0.874976	0.00849687	0.5	0	1.36529	1.59164	21.7181	2	4.64486	1	9.28972	17.6603	21.7181	15.0295	400.383	395.554	9.26029	10.161	45.6963	50.1411	300.07	1209.88	0.166481	100.048	0.276199	-0.180191	0.5	-1.35514	7.35514	1	0	0.16	111115	17506
50614	19511942	blau	low-light	WT	2	11:34:21	353	0	2.74548	0.101582	149.747	-2.29	0.87	0.92	9.95181	0.874976	0.00475451	0.5	0	1.53209	1.49832	21.1947	2	4.64486	1	9.28972	16.869	21.1947	14.1406	199.657	197.626	9.26095	10.2716	48.044	53.2872	300.064	1210.43	0.224495	100.046	0.863632	-0.209083	0.75	-1.35514	7.35514	1	0	0.16	111115	17660.5
50614	19511942	blau	low-light	WT	3	11:36:28	480.5	0	0.747012	0.118503	87.5153	-2.29	0.87	0.92	9.95181	0.874976	0.00286705	0.5	0	1.70662	1.4337	20.8455	2	4.64486	1	9.28972	16.529	20.8455	13.8032	100.506	99.8942	9.255	10.3807	49.0655	55.0333	300.067	1210.64	0.200783	100.054	0.658012	-0.230352	0.75	-1.35514	7.35514	1	0	0.16	111115	17788
50614	19511942	blau	low-light	WT	4	11:38:31	603.5	0	0.230664	0.1319	75.5941	-2.29	0.87	0.92	9.95181	0.874976	0.00237897	0.5	0	1.82524	1.37994	20.5384	2	4.64486	1	9.28972	16.3071	20.5384	13.5899	80.4228	80.1715	9.25042	10.4543	49.7423	56.216	300.05	1210.96	0.124102	100.061	0.583511	-0.245258	0.5	-1.35514	7.35514	1	0	0.16	111135	17911
50614	19511942	blau	low-light	WT	5	11:40:49	741	0	-1.96504	0.145523	23.2041	-2.29	0.87	0.92	9.95181	0.874976	0.000306605	0.5	0	1.94879	1.33754	20.3051	2	4.64486	1	9.28972	16.16	20.3051	13.4461	0.270499	1.57812	9.2461	10.5313	50.1878	57.1636	300.082	1211.32	0.168496	100.061	0.0369085	-0.260167	0.75	-1.35514	7.35514	1	0	0.16	111105	18048.5
50614	19511942	blau	low-light	WT	6	11:44:09	941	0	9.13105	0.161328	295.182	-2.29	0.87	0.92	9.95181	0.874976	0.0107784	0.5	0	2.1147	1.31128	20.2085	2	4.64486	1	9.28972	16.0473	20.2085	13.3341	401.068	394.427	9.25847	10.6528	50.6119	58.2341	300.098	1211.03	0.196747	100.05	0.132764	-0.230375	0.25	-1.35514	7.35514	1	0	0.16	111115	18248.5
50614	19511942	blau	low-light	WT	7	11:47:43	1155	0	12.4681	0.179827	662.601	-2.29	0.87	0.92	9.95181	0.874976	0.0139288	0.5	0	2.29441	1.27885	20.0939	2	4.64486	1	9.28972	16.0487	20.0939	13.3304	799.969	790.451	9.29644	10.8091	50.8144	59.0827	300.076	1210.93	0.125616	100.049	-2.8236	-0.21819	0.25	-1.35514	7.35514	1	0	0.16	111115	18462.5
50614	19511942	blau	low-light	WT	8	11:51:13	1365.5	0	13.5708	0.203361	1057.71	-2.29	0.87	0.92	9.95181	0.874976	0.0149708	0.5	0	2.55545	1.26257	20.1399	2	4.64486	1	9.28972	16.1064	20.1399	13.3778	1200.57	1189.5	9.35362	11.0381	50.9438	60.118	300.07	1210.83	0.134697	100.058	-7.63072	-0.138582	0.5	-1.35514	7.35514	1	0	0.16	111115	18673
50614	19511942	blau	low-light	WT	9	11:54:25	1557.5	0	15.8404	0.211289	1825.01	-2.29	0.87	0.92	9.95181	0.874976	0.0171134	0.5	0	2.64082	1.25675	20.1737	2	4.64486	1	9.28972	16.1711	20.1737	13.4375	2000.2	1986.14	9.40507	11.1456	51.0135	60.4541	300.071	1210.8	0.143274	100.059	-19.7294	-0.110287	0.5	-1.35514	7.35514	1	0	0.16	111115	18865
60614	19511940	blau	low-light	WT	Obs	HHMMSS	FTime	EBal?	Photo	Cond	Ci	Adark	RedAbs	BlueAbs	%Blue	LeafAbs	PhiCO2	PS2/1	ETR	Trmmol	VpdL	CTleaf	Area	BLC_1	StmRat	BLCond	Tair	Tleaf	TBlk	CO2R	CO2S	H2OR	H2OS	RH_R	RH_S	Flow	PARi	PARo	Press	CsMch	HsMch	StableF	BLCslope	BLCoffst	f_parin	f_parout	alphaK	Status	Time
60614	19511940	blau	low-light	WT	in	in	in	in	out	out	out	in	in	in	in	out	out	in	out	out	out	out	in	out	in	out	in	in	in	in	in	in	in	in	in	in	in	in	in	in	in	in	in	in	in	in	in	in	in
60614	19511940	blau	low-light	WT	1	10:26:02	417.5	0	6.98656	0.102333	275.123	-2.29	0.87	0.92	9.95181	0.874976	0.0087765	0.5	0	1.59154	1.55198	22.2472	2	4.64486	1	9.28972	17.6301	22.2472	14.9295	398.865	393.791	10.299	11.3477	51.21	56.4249	300.059	1208.01	0.230551	100.619	0.0263653	-0.231194	0.25	-1.35514	7.35514	1	0	0.16	111115	15042
60614	19511940	blau	low-light	WT	2	10:28:42	577.5	0	3.05796	0.111134	148.752	-2.29	0.87	0.92	9.95181	0.874976	0.00505953	0.5	0	1.65941	1.49175	21.9115	2	4.64486	1	9.28972	17.1161	21.9115	14.371	199.662	197.406	10.3108	11.4042	52.9603	58.5765	300.066	1208.04	0.208351	100.617	0.729948	-0.257787	0.75	-1.35514	7.35514	1	0	0.16	111115	15202
60614	19511940	blau	low-light	WT	3	10:31:00	715.5	0	0.643108	0.121687	88.4512	-2.29	0.87	0.92	9.95181	0.874976	0.00277411	0.5	0	1.75831	1.44544	21.6603	2	4.64486	1	9.28972	16.8974	21.6603	14.1496	99.7402	99.1953	10.3066	11.4651	53.6776	59.7113	300.06	1208.39	0.157398	100.617	0.626348	-0.279486	0.75	-1.35514	7.35514	1	0	0.16	111115	15340
60614	19511940	blau	low-light	WT	4	10:33:02	837.5	0	0.31093	0.131721	81.1993	-2.29	0.87	0.92	9.95181	0.874976	0.00245996	0.5	0	1.86482	1.41784	21.5226	2	4.64486	1	9.28972	16.7925	21.5226	14.0489	87.2648	86.9495	10.294	11.5227	53.97	60.4116	300.058	1208.39	0.159418	100.617	0.697187	-0.288621	0.75	-1.35514	7.35514	1	0	0.16	111135	15462
60614	19511940	blau	low-light	WT	5	10:35:33	988	0	-2.13328	0.143841	29.3638	-2.29	0.87	0.92	9.95181	0.874976	0.000148201	0.5	0	1.99253	1.38926	21.3817	2	4.64486	1	9.28972	16.705	21.3817	13.9678	4.29939	5.7137	10.2734	11.5861	54.1648	61.0858	300.061	1208.61	0.104429	100.622	0.191529	-0.309952	0.75	-1.35514	7.35514	1	0	0.16	111105	15612.5
60614	19511940	blau	low-light	WT	6	10:39:07	1202	0	9.18778	0.161919	295.672	-2.29	0.87	0.92	9.95181	0.874976	0.0108534	0.5	0	2.18156	1.35385	21.2236	2	4.64486	1	9.28972	16.6605	21.2236	13.9242	402.074	395.376	10.2568	11.6938	54.2273	61.8245	300.081	1208.64	0.162444	100.617	0.381257	-0.27989	0.5	-1.35514	7.35514	1	0	0.16	111115	15826.5
60614	19511940	blau	low-light	WT	7	10:41:52	1367.5	0	14.3712	0.183579	645.298	-2.29	0.87	0.92	9.95181	0.874976	0.0157571	0.5	0	2.41698	1.32591	21.1367	2	4.64486	1	9.28972	16.6348	21.1367	13.9021	798.871	788.023	10.2463	11.8383	54.2572	62.6869	300.06	1208.46	0.245687	100.611	-3.18027	-0.187618	0.5	-1.35514	7.35514	1	0	0.16	111115	15992
60614	19511940	blau	low-light	WT	8	10:44:25	1520.5	0	16.3256	0.195608	1029.19	-2.29	0.87	0.92	9.95181	0.874976	0.0176052	0.5	0	2.52712	1.30274	21.0314	2	4.64486	1	9.28972	16.6201	21.0314	13.8885	1201.35	1188.47	10.2437	11.908	54.2915	63.1125	300.063	1208.48	0.201796	100.607	-7.60947	-0.171552	0.25	-1.35514	7.35514	1	0	0.16	111115	16145
60614	19511940	blau	low-light	WT	9	10:47:42	1717.5	0	16.8771	0.203369	1810	-2.29	0.87	0.92	9.95181	0.874976	0.0181234	0.5	0	2.61576	1.29793	21.0361	2	4.64486	1	9.28972	16.6252	21.0361	13.8934	1999.76	1985.05	10.2408	11.9635	54.2563	63.3829	300.059	1208.71	0.17556	100.602	-19.7063	-0.139135	0.25	-1.35514	7.35514	1	0	0.16	111115	16342
60614	19511941	blau	low-light	WT	Obs	HHMMSS	FTime	EBal?	Photo	Cond	Ci	Adark	RedAbs	BlueAbs	%Blue	LeafAbs	PhiCO2	PS2/1	ETR	Trmmol	VpdL	CTleaf	Area	BLC_1	StmRat	BLCond	Tair	Tleaf	TBlk	CO2R	CO2S	H2OR	H2OS	RH_R	RH_S	Flow	PARi	PARo	Press	CsMch	HsMch	StableF	BLCslope	BLCoffst	f_parin	f_parout	alphaK	Status	Time
60614	19511941	blau	low-light	WT	in	in	in	in	out	out	out	in	in	in	in	out	out	in	out	out	out	out	in	out	in	out	in	in	in	in	in	in	in	in	in	in	in	in	in	in	in	in	in	in	in	in	in	in	in
60614	19511941	blau	low-light	WT	1	09:52:12	469.5	0	6.07737	0.0891996	277.169	-2.29	0.87	0.92	9.95181	0.874976	0.00790514	0.5	0	1.31333	1.46822	21.6602	2	4.64486	1	9.28972	17.8516	21.6602	15.2066	399.457	395.061	10.3709	11.2364	50.8613	55.1061	300.066	1209.71	0.057511	100.636	0.301256	-0.225683	0.75	-1.35514	7.35514	1	0	0.16	111115	13012
60614	19511941	blau	low-light	WT	2	09:54:30	607.5	0	2.4232	0.0915425	150.772	-2.29	0.87	0.92	9.95181	0.874976	0.0044523	0.5	0	1.3016	1.41853	21.3532	2	4.64486	1	9.28972	17.2787	21.3532	14.5569	199.264	197.478	10.3918	11.2496	52.8384	57.2	300.06	1209.86	0.22046	100.634	0.78203	-0.242588	0.75	-1.35514	7.35514	1	0	0.16	111115	13150
60614	19511941	blau	low-light	WT	3	09:57:03	760.5	0	0.390813	0.0979256	90.3617	-2.29	0.87	0.92	9.95181	0.874976	0.002532	0.5	0	1.3422	1.36869	21.0455	2	4.64486	1	9.28972	16.9201	21.0455	14.1951	99.2477	98.8987	10.3863	11.2708	54.0243	58.625	300.071	1210.06	0.144788	100.635	0.54661	-0.256462	0.5	-1.35514	7.35514	1	0	0.16	111115	13303
60614	19511941	blau	low-light	WT	4	09:58:49	866.5	0	0.200008	0.105285	81.2222	-2.29	0.87	0.92	9.95181	0.874976	0.00235123	0.5	0	1.40982	1.33832	20.8638	2	4.64486	1	9.28972	16.7705	20.8638	14.0464	86.3153	86.101	10.3674	11.2965	54.4385	59.3172	300.052	1210.35	0.229038	100.632	0.694803	-0.261438	0.75	-1.35514	7.35514	1	0	0.16	111135	13409
60614	19511941	blau	low-light	WT	5	10:00:58	995	0	-2.25077	0.115247	35.8867	-2.29	0.87	0.92	9.95181	0.874976	3.70389e-05	0.5	0	1.52254	1.32184	20.7854	2	4.64486	1	9.28972	16.6626	20.7854	13.9396	3.24527	4.7406	10.3387	11.342	54.6611	59.9654	300.074	1210.35	0.108969	100.632	0.234587	-0.283103	0.75	-1.35514	7.35514	1	0	0.16	111105	13537.5
60614	19511941	blau	low-light	WT	6	10:04:32	1209.5	0	8.62909	0.139036	288.175	-2.29	0.87	0.92	9.95181	0.874976	0.0103076	0.5	0	1.77646	1.28174	20.5998	2	4.64486	1	9.28972	16.5511	20.5998	13.8277	402.051	395.831	10.2919	11.4624	54.8005	61.0328	300.067	1210.69	0.212893	100.631	0.363371	-0.250706	0.5	-1.35514	7.35514	1	0	0.16	111115	13752
60614	19511941	blau	low-light	WT	7	10:07:54	1411	0	13.0104	0.161391	644.562	-2.29	0.87	0.92	9.95181	0.874976	0.0144431	0.5	0	2.0023	1.24764	20.4469	2	4.64486	1	9.28972	16.4753	20.4469	13.7548	799.638	789.912	10.2545	11.5736	54.8671	61.9248	300.08	1210.73	0.111995	100.635	-2.41922	-0.239903	0.25	-1.35514	7.35514	1	0	0.16	111115	13953.5
60614	19511941	blau	low-light	WT	8	10:11:27	1624.5	0	15.5257	0.194007	1036.73	-2.29	0.87	0.92	9.95181	0.874976	0.0168195	0.5	0	2.33522	1.21453	20.3536	2	4.64486	1	9.28972	16.4409	20.3536	13.7139	1201.07	1188.88	10.2275	11.7656	54.8395	63.0868	300.075	1210.58	0.287054	100.629	-7.5994	-0.164868	0.5	-1.35514	7.35514	1	0	0.16	111115	14167
60614	19511941	blau	low-light	WT	9	10:14:41	1818.5	0	16.9382	0.207622	1815.29	-2.29	0.87	0.92	9.95181	0.874976	0.0181534	0.5	0	2.47563	1.20479	20.3337	2	4.64486	1	9.28972	16.4087	20.3337	13.6841	1999.84	1985.27	10.2029	11.8335	54.8183	63.5788	300.065	1210.56	0.177578	100.626	-19.4235	-0.138618	0.5	-1.35514	7.35514	1	0	0.16	111115	14361
60614	19602545	gelb	low-light	WT	Obs	HHMMSS	FTime	EBal?	Photo	Cond	Ci	Adark	RedAbs	BlueAbs	%Blue	LeafAbs	PhiCO2	PS2/1	ETR	Trmmol	VpdL	CTleaf	Area	BLC_1	StmRat	BLCond	Tair	Tleaf	TBlk	CO2R	CO2S	H2OR	H2OS	RH_R	RH_S	Flow	PARi	PARo	Press	CsMch	HsMch	StableF	BLCslope	BLCoffst	f_parin	f_parout	alphaK	Status	Time
60614	19602545	gelb	low-light	WT	in	in	in	in	out	out	out	in	in	in	in	out	out	in	out	out	out	out	in	out	in	out	in	in	in	in	in	in	in	in	in	in	in	in	in	in	in	in	in	in	in	in	in	in	in
60614	19602545	gelb	low-light	WT	1	09:19:51	511.5	0	7.07842	0.115067	286.874	-2.29	0.87	0.92	9.95181	0.874976	0.00885613	0.5	0	1.6958	1.47363	21.7666	2	4.64486	1	9.28972	17.5128	21.7666	14.8553	399.624	394.461	10.2325	11.35	51.2719	56.871	300.072	1209	0.13722	100.648	0.308422	-0.245514	0.5	-1.35514	7.35514	1	0	0.16	111115	11071
60614	19602545	gelb	low-light	WT	2	09:22:58	698.5	0	2.89048	0.118536	154.314	-2.29	0.87	0.92	9.95181	0.874976	0.00489647	0.5	0	1.68455	1.42187	21.4373	2	4.64486	1	9.28972	16.9639	21.4373	14.2504	199.952	197.803	10.2361	11.3462	53.1003	58.8588	300.062	1209.18	0.179093	100.644	0.758419	-0.264228	0.5	-1.35514	7.35514	1	0	0.16	111115	11258
60614	19602545	gelb	low-light	WT	3	09:25:06	826.5	0	0.0925732	0.124684	95.8723	-2.29	0.87	0.92	9.95181	0.874976	0.00225178	0.5	0	1.72712	1.38704	21.2286	2	4.64486	1	9.28972	16.7954	21.2286	14.077	99.4371	99.2611	10.2304	11.3684	53.6411	59.6083	300.072	1209.27	0.181616	100.645	0.696117	-0.281668	0.75	-1.35514	7.35514	1	0	0.16	111115	11386
60614	19602545	gelb	low-light	WT	4	09:26:56	936.5	0	0.255433	0.130954	80.2117	-2.29	0.87	0.92	9.95181	0.874976	0.00240551	0.5	0	1.796	1.37421	21.1681	2	4.64486	1	9.28972	16.705	21.1681	13.9903	85.4793	85.2071	10.2196	11.4031	53.8915	60.1322	300.061	1209.37	0.185149	100.642	0.529934	-0.284536	0.5	-1.35514	7.35514	1	0	0.16	111135	11496
60614	19602545	gelb	low-light	WT	5	09:29:14	1074.5	0	-2.17175	0.139284	28.9504	-2.29	0.87	0.92	9.95181	0.874976	0.000111776	0.5	0	1.8791	1.35313	21.0601	2	4.64486	1	9.28972	16.6316	21.0601	13.9169	2.60072	4.04323	10.2083	11.4464	54.0851	60.6452	300.054	1209.05	0.184137	100.645	0.129869	-0.305529	0.75	-1.35514	7.35514	1	0	0.16	111105	11634
60614	19602545	gelb	low-light	WT	6	09:32:42	1282	0	9.31452	0.155238	290.462	-2.29	0.87	0.92	9.95181	0.874976	0.0109656	0.5	0	2.04197	1.3216	20.9155	2	4.64486	1	9.28972	16.5823	20.9155	13.8728	401.902	395.156	10.1944	11.5397	54.1804	61.3302	300.073	1209.48	0.2139	100.644	0.261797	-0.268128	0.5	-1.35514	7.35514	1	0	0.16	111115	11841.5
60614	19602545	gelb	low-light	WT	7	09:36:16	1496	0	13.4547	0.167558	643.846	-2.29	0.87	0.92	9.95181	0.874976	0.0148774	0.5	0	2.18328	1.31082	20.8979	2	4.64486	1	9.28972	16.5556	20.8979	13.8497	799.597	789.48	10.182	11.6203	54.206	61.8628	300.076	1209.51	0.164965	100.642	-2.61204	-0.252786	0.5	-1.35514	7.35514	1	0	0.16	111115	12055.5
60614	19602545	gelb	low-light	WT	8	09:39:51	1711.5	0	15.0486	0.191199	1037.97	-2.29	0.87	0.92	9.95181	0.874976	0.0163828	0.5	0	2.4343	1.28398	20.8238	2	4.64486	1	9.28972	16.5586	20.8238	13.8461	1201.16	1189.2	10.1714	11.7748	54.1387	62.6734	300.055	1209.56	0.208353	100.642	-7.47825	-0.17079	0.5	-1.35514	7.35514	1	0	0.16	111115	12271
60614	19602545	gelb	low-light	WT	9	09:43:26	1926.5	0	16.9801	0.194203	1804.5	-2.29	0.87	0.92	9.95181	0.874976	0.0182067	0.5	0	2.45592	1.27575	20.7797	2	4.64486	1	9.28972	16.5435	20.7797	13.836	2000.5	1985.93	10.173	11.7906	54.1976	62.8157	300.064	1209.64	0.134191	100.639	-19.9535	-0.134489	0.5	-1.35514	7.35514	1	0	0.16	111115	12486
60614	19602546	gelb	low-light	WT	Obs	HHMMSS	FTime	EBal?	Photo	Cond	Ci	Adark	RedAbs	BlueAbs	%Blue	LeafAbs	PhiCO2	PS2/1	ETR	Trmmol	VpdL	CTleaf	Area	BLC_1	StmRat	BLCond	Tair	Tleaf	TBlk	CO2R	CO2S	H2OR	H2OS	RH_R	RH_S	Flow	PARi	PARo	Press	CsMch	HsMch	StableF	BLCslope	BLCoffst	f_parin	f_parout	alphaK	Status	Time
60614	19602546	gelb	low-light	WT	in	in	in	in	out	out	out	in	in	in	in	out	out	in	out	out	out	out	in	out	in	out	in	in	in	in	in	in	in	in	in	in	in	in	in	in	in	in	in	in	in	in	in	in	in
60614	19602546	gelb	low-light	WT	1	08:38:36	538	0	5.43501	0.106267	304.452	-2.29	0.87	0.92	9.95181	0.874976	0.00732852	0.5	0	1.53311	1.4419	21.4932	2	4.64486	1	9.28972	17.5982	21.4932	14.9893	399.266	395.24	10.2216	11.232	50.9515	55.9877	300.081	1204.72	0.147815	100.667	-0.674263	-0.220767	1	-1.35514	7.35514	1	0	0.16	111115	8596
60614	19602546	gelb	low-light	WT	2	08:40:49	670.5	0	1.77186	0.101064	165.956	-2.29	0.87	0.92	9.95181	0.874976	0.00385202	0.5	0	1.42314	1.40692	21.2234	2	4.64486	1	9.28972	17.0205	21.2234	14.3139	199.781	198.411	10.2228	11.1607	52.8516	57.7008	300.065	1205.15	0.215415	100.664	0.133858	-0.227534	0.75	-1.35514	7.35514	1	0	0.16	111115	8728.5
60614	19602546	gelb	low-light	WT	3	08:43:07	808.5	0	-0.0405962	0.105206	99.4304	-2.29	0.87	0.92	9.95181	0.874976	0.00213282	0.5	0	1.44364	1.37186	20.9974	2	4.64486	1	9.28972	16.6935	20.9974	13.974	101.099	101.029	10.2109	11.1624	53.8977	58.9199	300.072	1205.36	0.176065	100.665	0.214081	-0.240821	1	-1.35514	7.35514	1	0	0.16	111115	8866.5
60614	19602546	gelb	low-light	WT	4	08:45:00	921.5	0	-0.078471	0.110576	83.8207	-2.29	0.87	0.92	9.95181	0.874976	0.00209665	0.5	0	1.49825	1.35549	20.9076	2	4.64486	1	9.28972	16.5411	20.9076	13.8215	84.5491	84.517	10.201	11.1884	54.3701	59.633	300.071	1205.51	0.0469176	100.667	0.0487366	-0.248228	0.75	-1.35514	7.35514	1	0	0.16	111135	8979.5
60614	19602546	gelb	low-light	WT	5	08:47:17	1059	0	-1.88741	0.119932	28.0038	-2.29	0.87	0.92	9.95181	0.874976	0.000381827	0.5	0	1.6026	1.33819	20.8322	2	4.64486	1	9.28972	16.4374	20.8322	13.7138	1.62461	2.87942	10.1899	11.2459	54.6716	60.3377	300.092	1205.04	0.133185	100.669	-0.374866	-0.262895	0.75	-1.35514	7.35514	1	0	0.16	111105	9117
60614	19602546	gelb	low-light	WT	6	08:50:37	1259	0	6.96309	0.134527	306.188	-2.29	0.87	0.92	9.95181	0.874976	0.00877364	0.5	0	1.79025	1.33459	20.8854	2	4.64486	1	9.28972	16.4023	20.8854	13.6699	402.732	397.616	10.1828	11.3624	54.7544	61.0977	300.066	1205.34	0.170517	100.667	-0.448596	-0.232413	0.5	-1.35514	7.35514	1	0	0.16	111115	9317
60614	19602546	gelb	low-light	WT	7	08:53:24	1425.5	0	9.115	0.149059	678.088	-2.29	0.87	0.92	9.95181	0.874976	0.0108144	0.5	0	1.94466	1.31042	20.7921	2	4.64486	1	9.28972	16.398	20.7921	13.658	799.939	792.836	10.1803	11.4616	54.7564	61.648	300.071	1205.31	0.2699	100.667	-3.6928	-0.213907	0.5	-1.35514	7.35514	1	0	0.16	111115	9483.5
60614	19602546	gelb	low-light	WT	8	08:56:37	1618.5	0	10.8424	0.162302	1059.34	-2.29	0.87	0.92	9.95181	0.874976	0.0124508	0.5	0	2.08609	1.29283	20.7362	2	4.64486	1	9.28972	16.3585	20.7362	13.6264	1200.19	1191.31	10.1779	11.5522	54.8812	62.2919	300.067	1205.46	0.180102	100.667	-8.19341	-0.20089	0.25	-1.35514	7.35514	1	0	0.16	111115	9676.5
60614	19602546	gelb	low-light	WT	9	08:59:33	1794.5	0	12.2576	0.166358	1829.46	-2.29	0.87	0.92	9.95181	0.874976	0.0137921	0.5	0	2.14706	1.29857	20.7961	2	4.64486	1	9.28972	16.3618	20.7961	13.629	2000.21	1989.19	10.1716	11.586	54.8322	62.4569	300.082	1205.49	0.166986	100.661	-20.3519	-0.173322	0.5	-1.35514	7.35514	1	0	0.16	111115	9852.5
[truncated: 74 more columns]
